# Supplementary material
Source: PubMed Central journal article supplement (PMC4453794)
Supplement: supp_pp.15.00441_00441Supplementaryfigures515.pdf [file supp_pp.15.00441_00441Supplementaryfigures515.pdf]

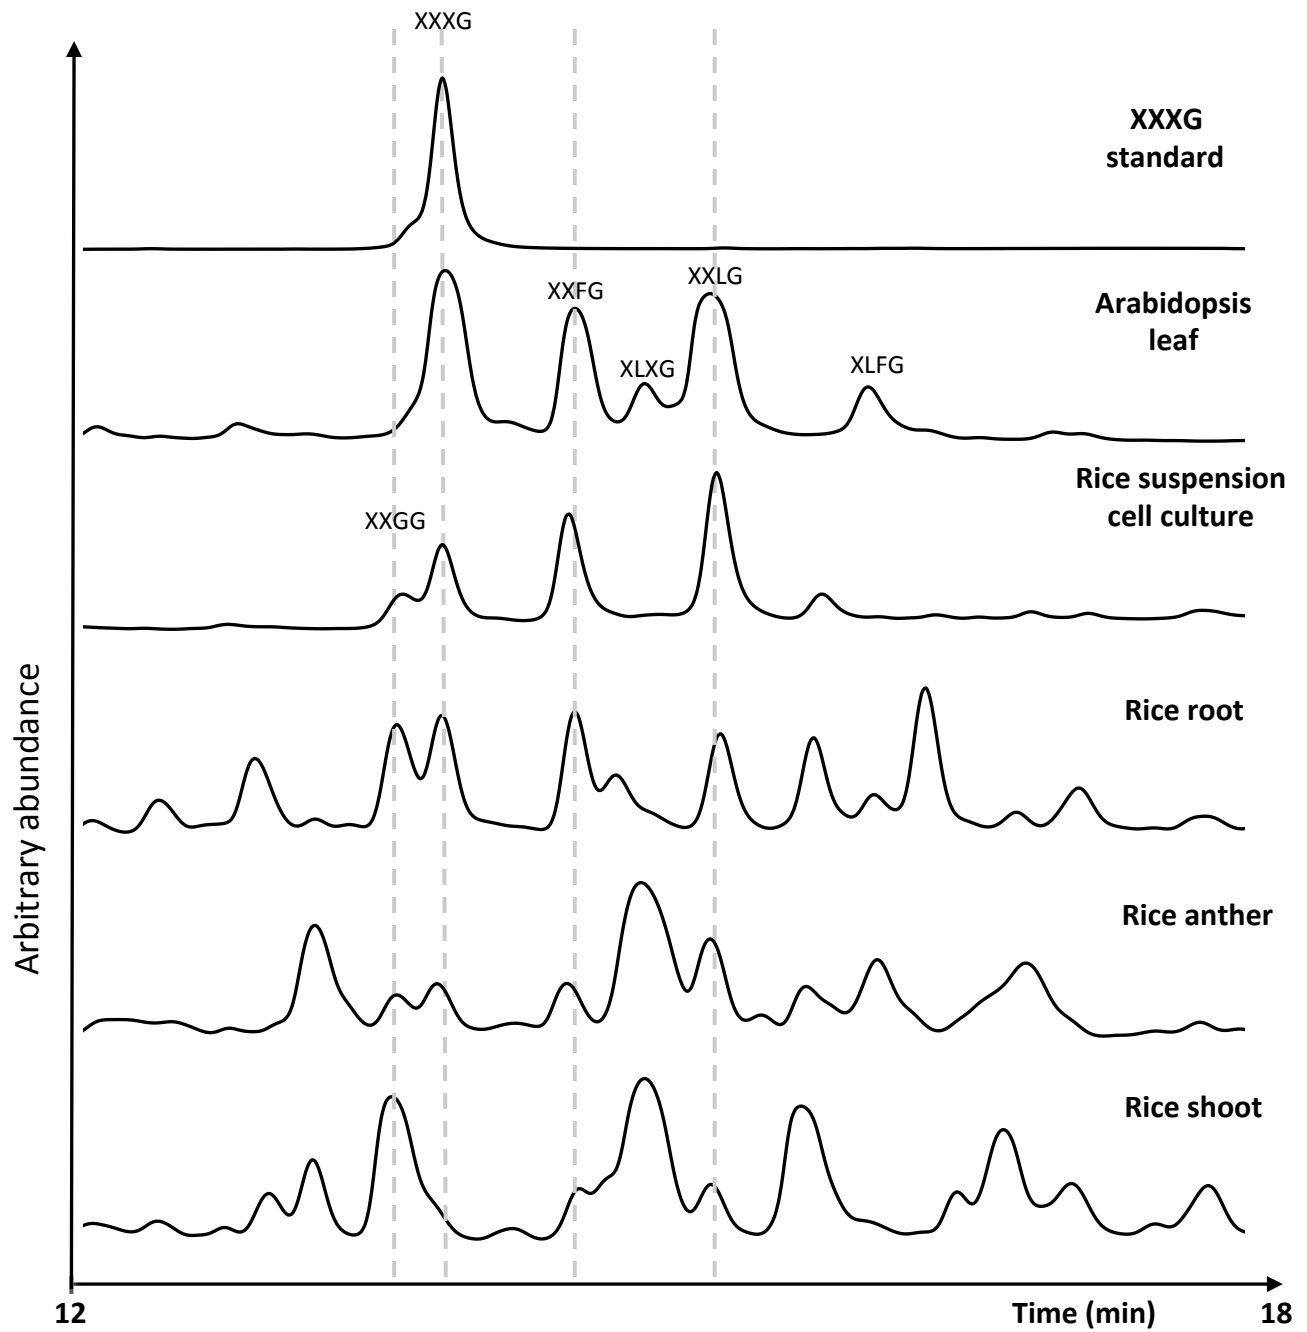

**Supplementary Figure S1.** HPAEC-PAD analysis of XyG oligosaccharides derived from various tissues. XXXG heptasaccharide and XEG digest oligosaccharides from *Arabidopsis* are used as controls. XyG oligosaccharides are annotated using the one-letter code nomenclature described by Fry et al., 1993.

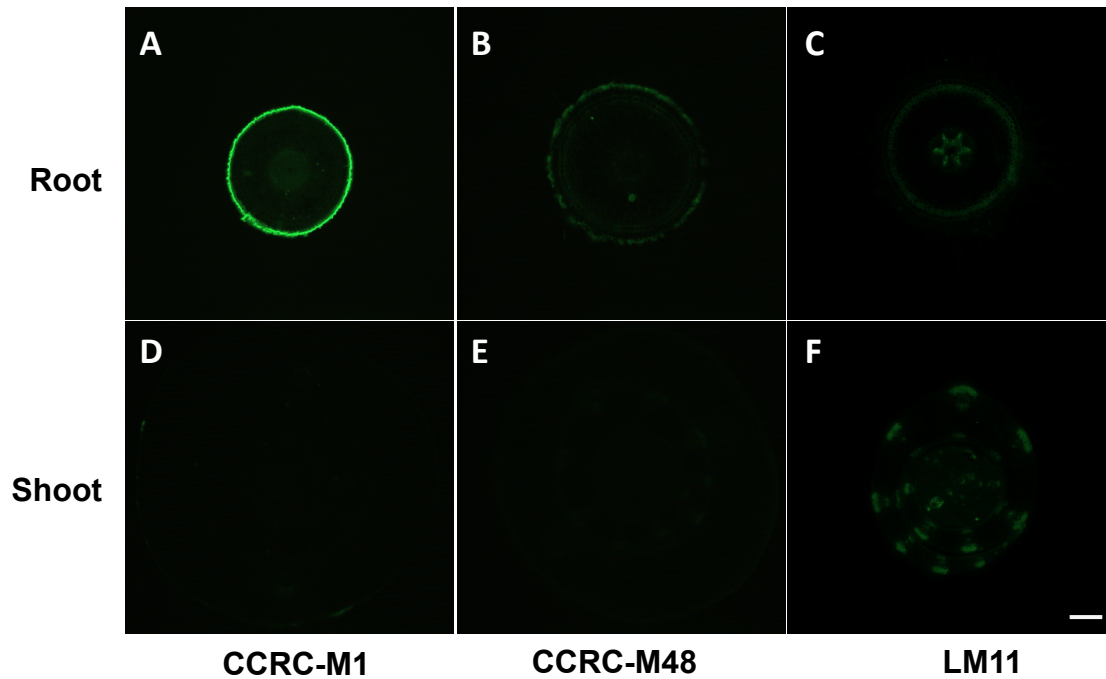

**Supplementary Figure S2.** Immunofluorescent labeling of 3-day-old rice root and shoot transverse sections with different antibodies. (A) to (C) Rice root cross-sections labeled with CCRC-M1 (A), CCRC-M48 (B), LM11 (C). (D) to (F) Rice shoot cross-sections labeled with CCRC-M1 (D), CCRC-M48 (E), LM11 (F). CCRC-M1 recognizes fucosylated xyloglucan; CCRC-M48 recognizes non-fucosylated xyloglucan; LM11 recognizes xylan. Bar=50  $\mu$ m.

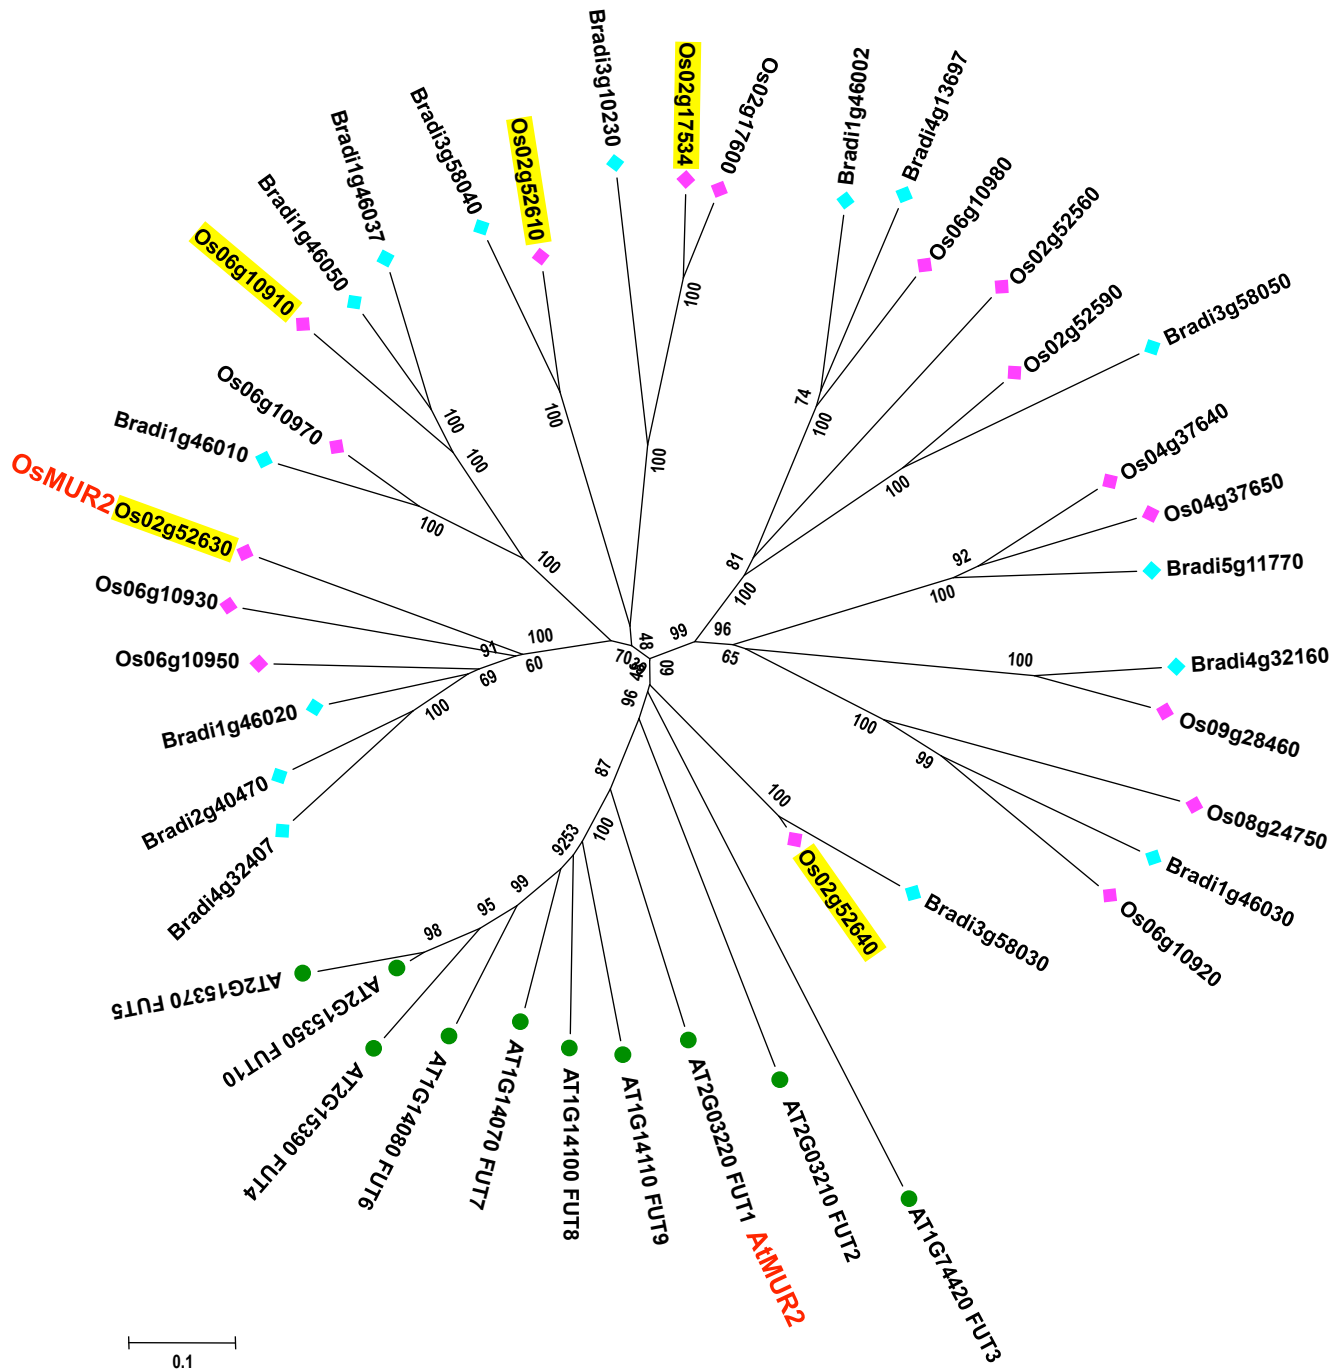

**Supplementary Figure S3.** Phylogenetic tree of MUR2 homologs in Arabidopsis, rice and Brachypodium. Genes shown in Table 1 are highlighted in yellow. Homologs were identified from Phytozome (<http://www.phytozome.net>). Bootstrap values are shown.



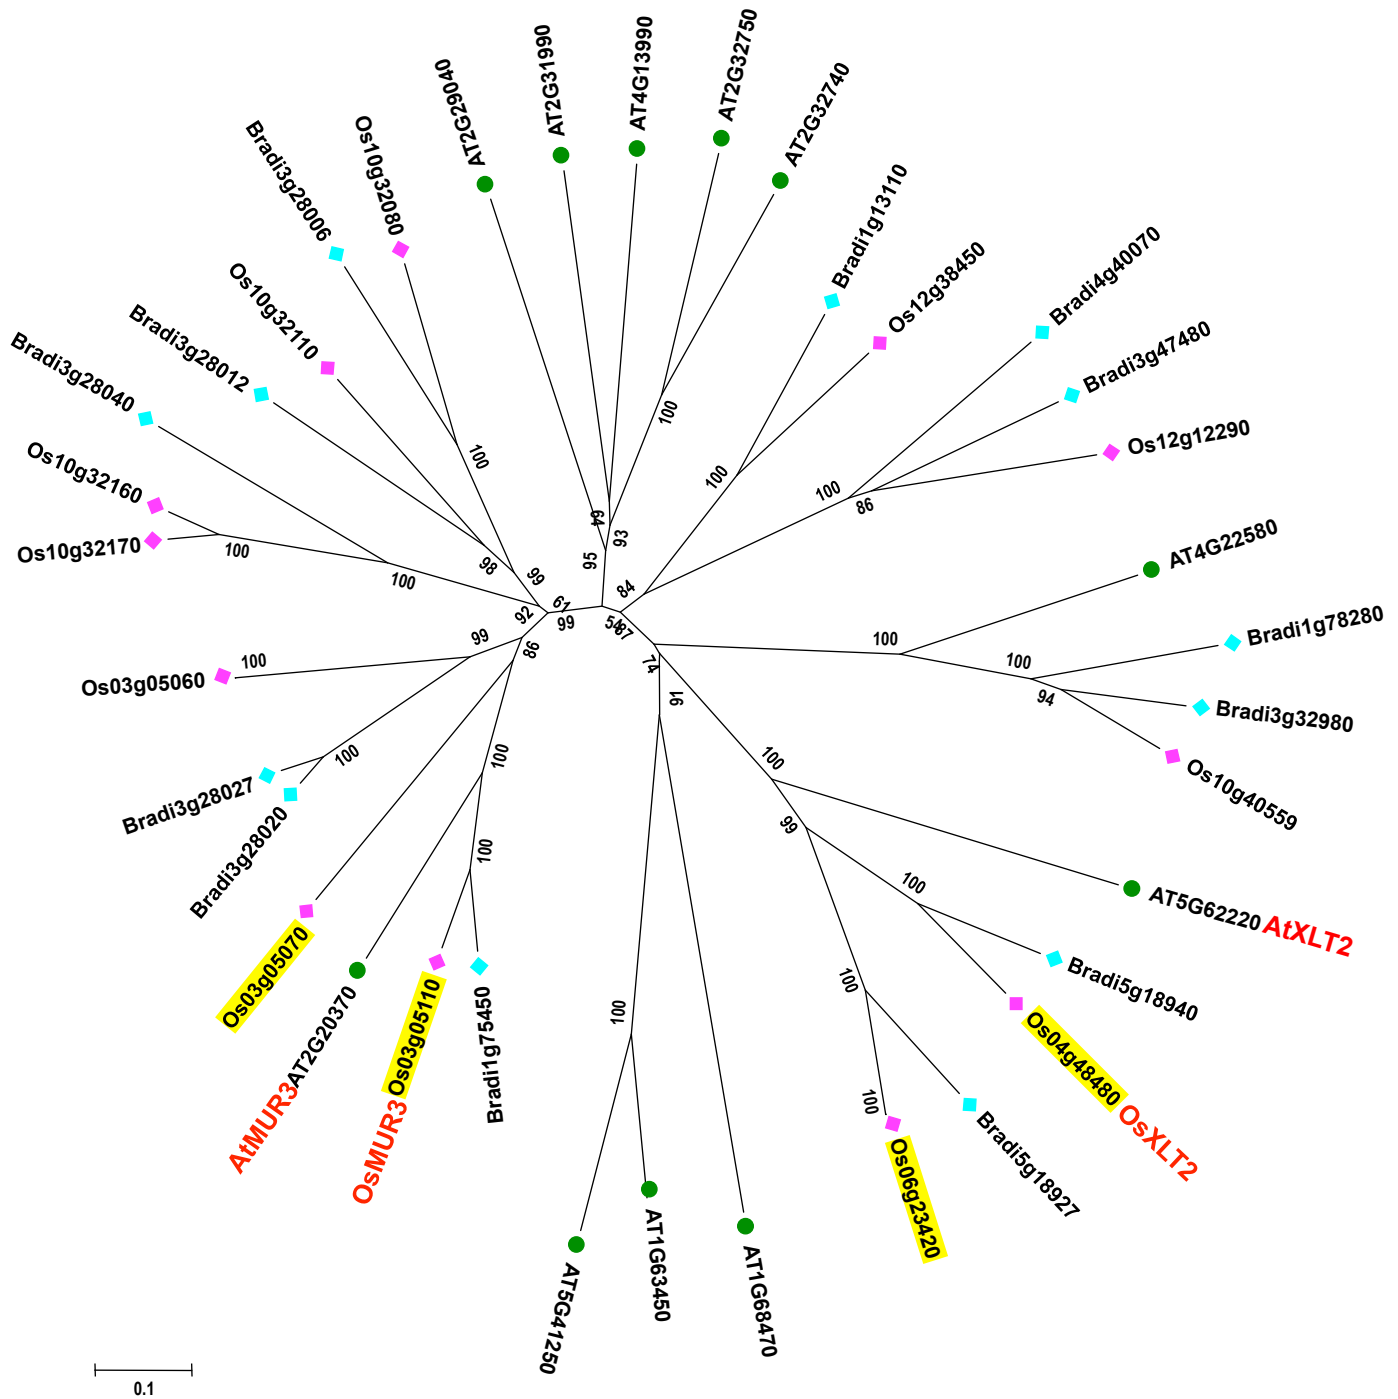

**Supplementary Figure S5.** Phylogenetic tree of MUR3 and XLT2 homologs in Arabidopsis, rice and Brachypodium. Homologs were identified from Phytozome (<http://www.phytozome.net>). Genes listed in Table 1 are marked in yellow. Bootstrap values are shown.

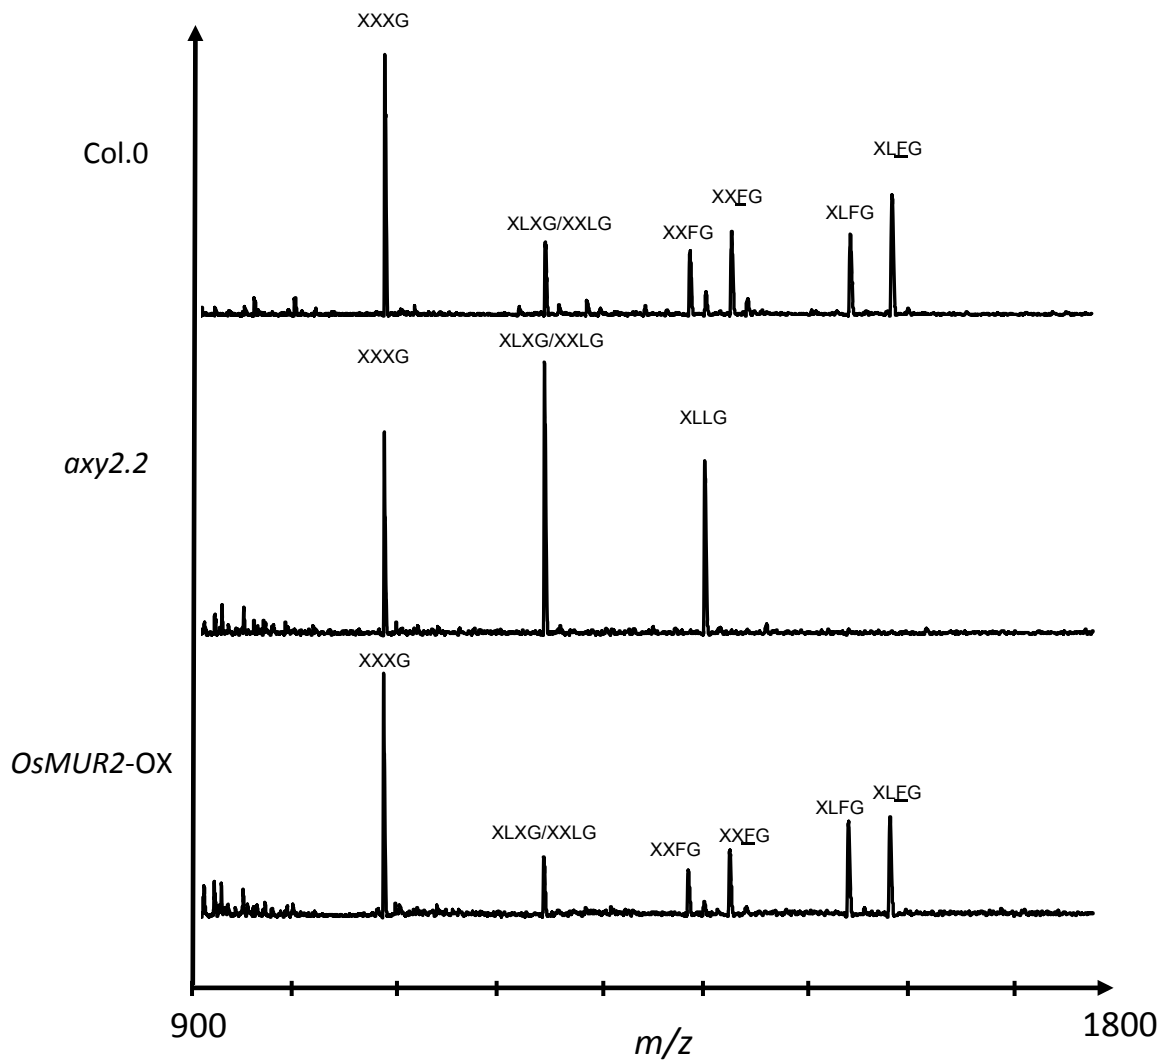

**Supplementary Figure S6.** XyG oligosaccharide mass profiling of 4-week-old leaves of Arabidopsis Col.0, *axy2.2/fut1* and *OsMUR2* transformants of the Arabidopsis *axy2.2* mutant. One representative line of the *OsMUR2* transformants is shown here. OX, independent overexpression line.

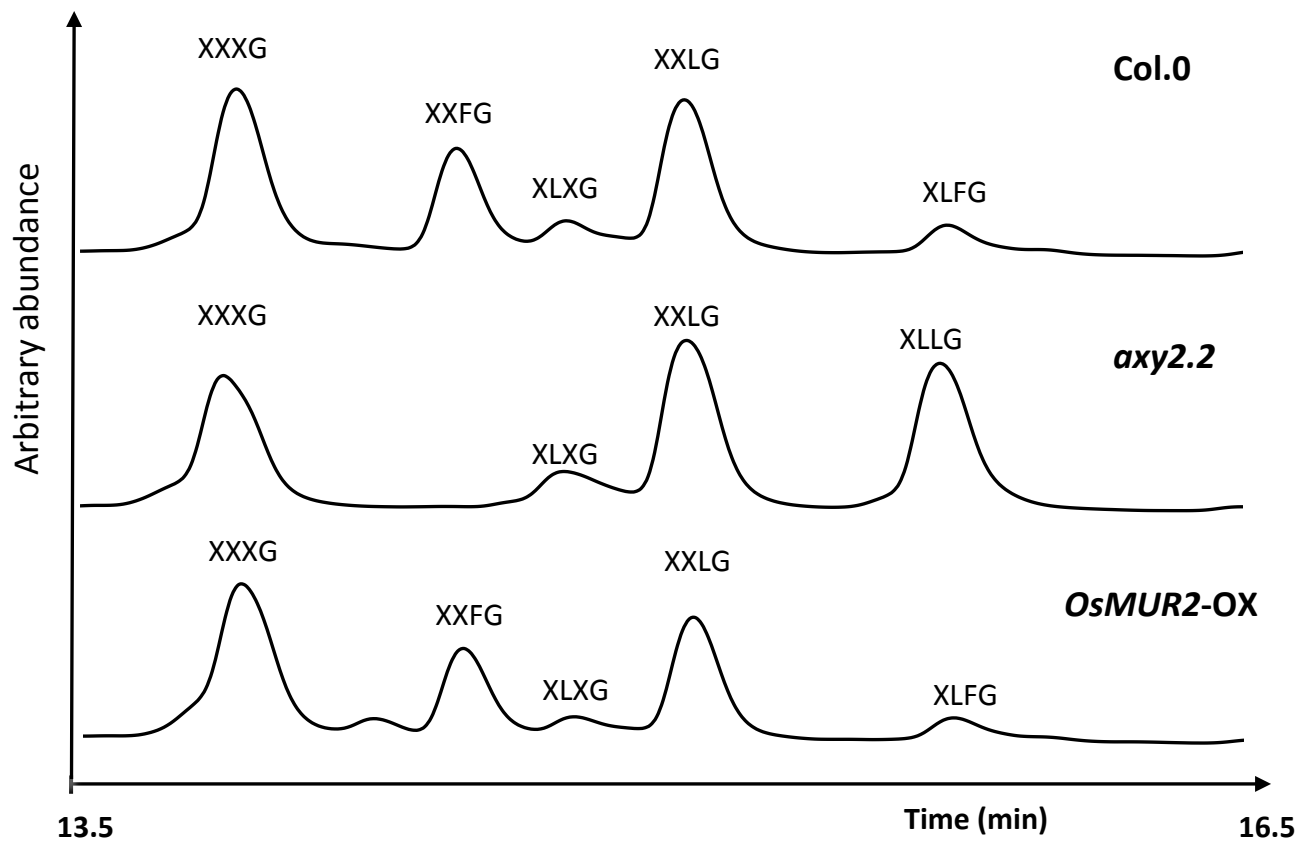

**Supplementary Figure S7.** Xyloglucan HPAEC spectra derived from walls of 4-week-old leaves from Col.0, *axy2.2* and *OsMUR2* transformants of *Arabidopsis axy2.2* mutants. One representative line of the *OsMUR2* transformants is shown here. OX, independent overexpression line.

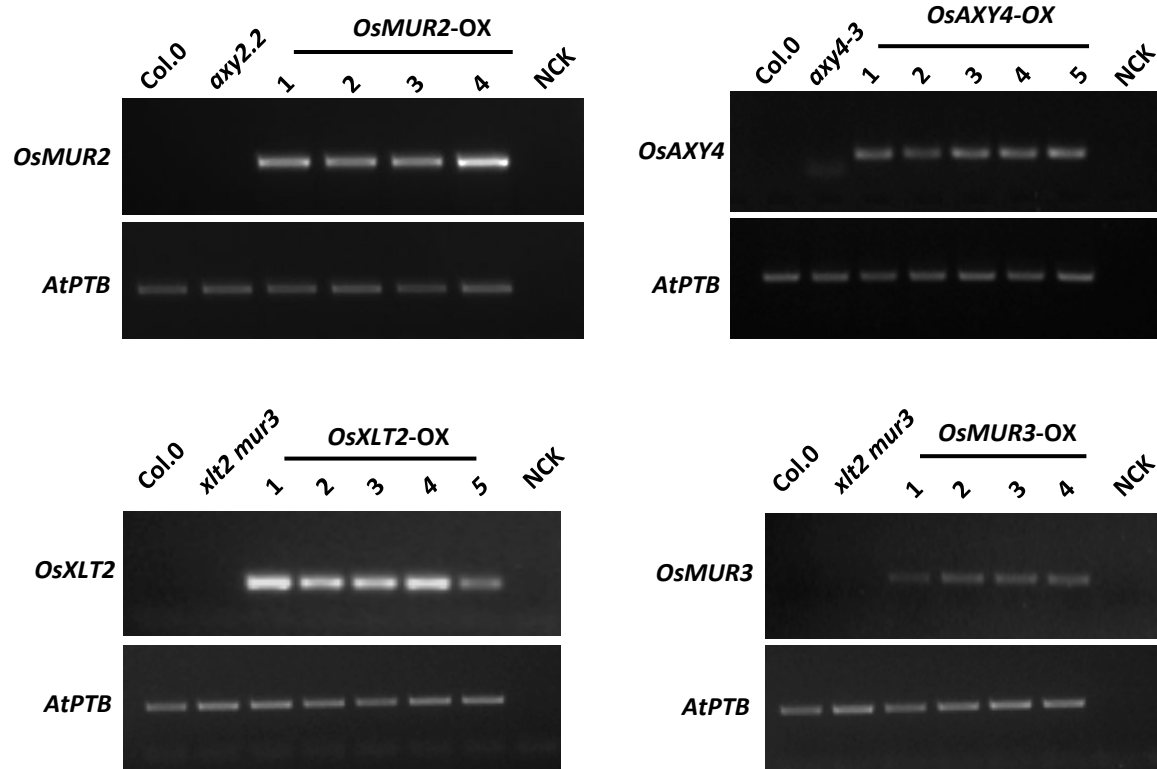

**Supplementary Figure S8.** RT-PCR analysis of total RNA extracted from 4-week-old leaves of Arabidopsis wild-type (Col.0), mutants and all transformants (*OsMUR2-OX-axy2.2*, *OsAXY4-OX-axy4-3*, *OsXLT2-OX-xlt2 mur3* and *OsMUR3-OX-xlt2 mur3*). The RT-PCR was performed using specific primers for each gene (See Supplementary Table S5). *AtPTB* transcript as a reference gene is shown on lower panel. OX, overexpression. NCK, no template control.



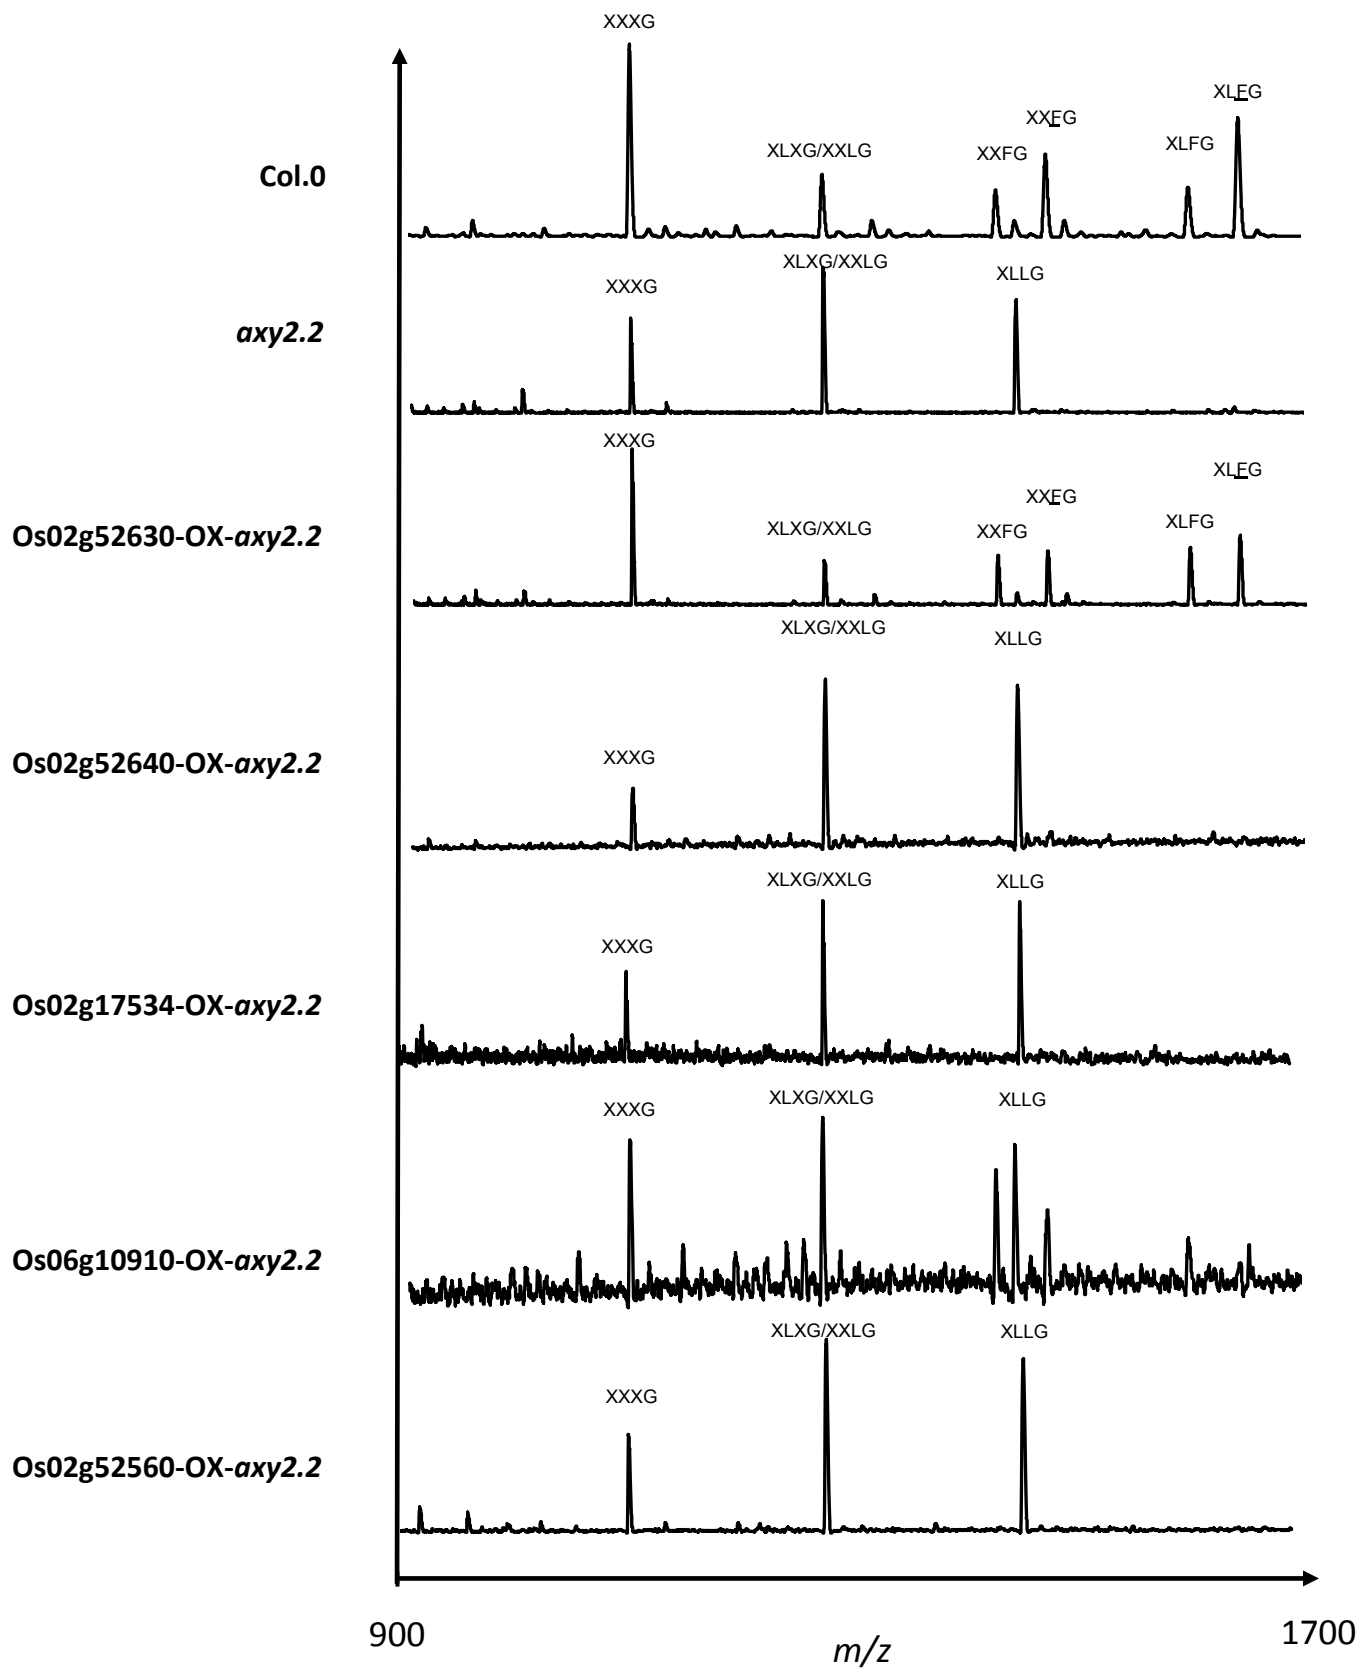

**Supplementary Figure S9.** XyG oligosaccharide mass profiling of 4-week-old leaves from *Arabidopsis* Col.0 and rice homologs of *AtMUR2* transformed into the *Arabidopsis axy2.2* mutant. One representative line of the transformants is shown here. OX, independent overexpression line.

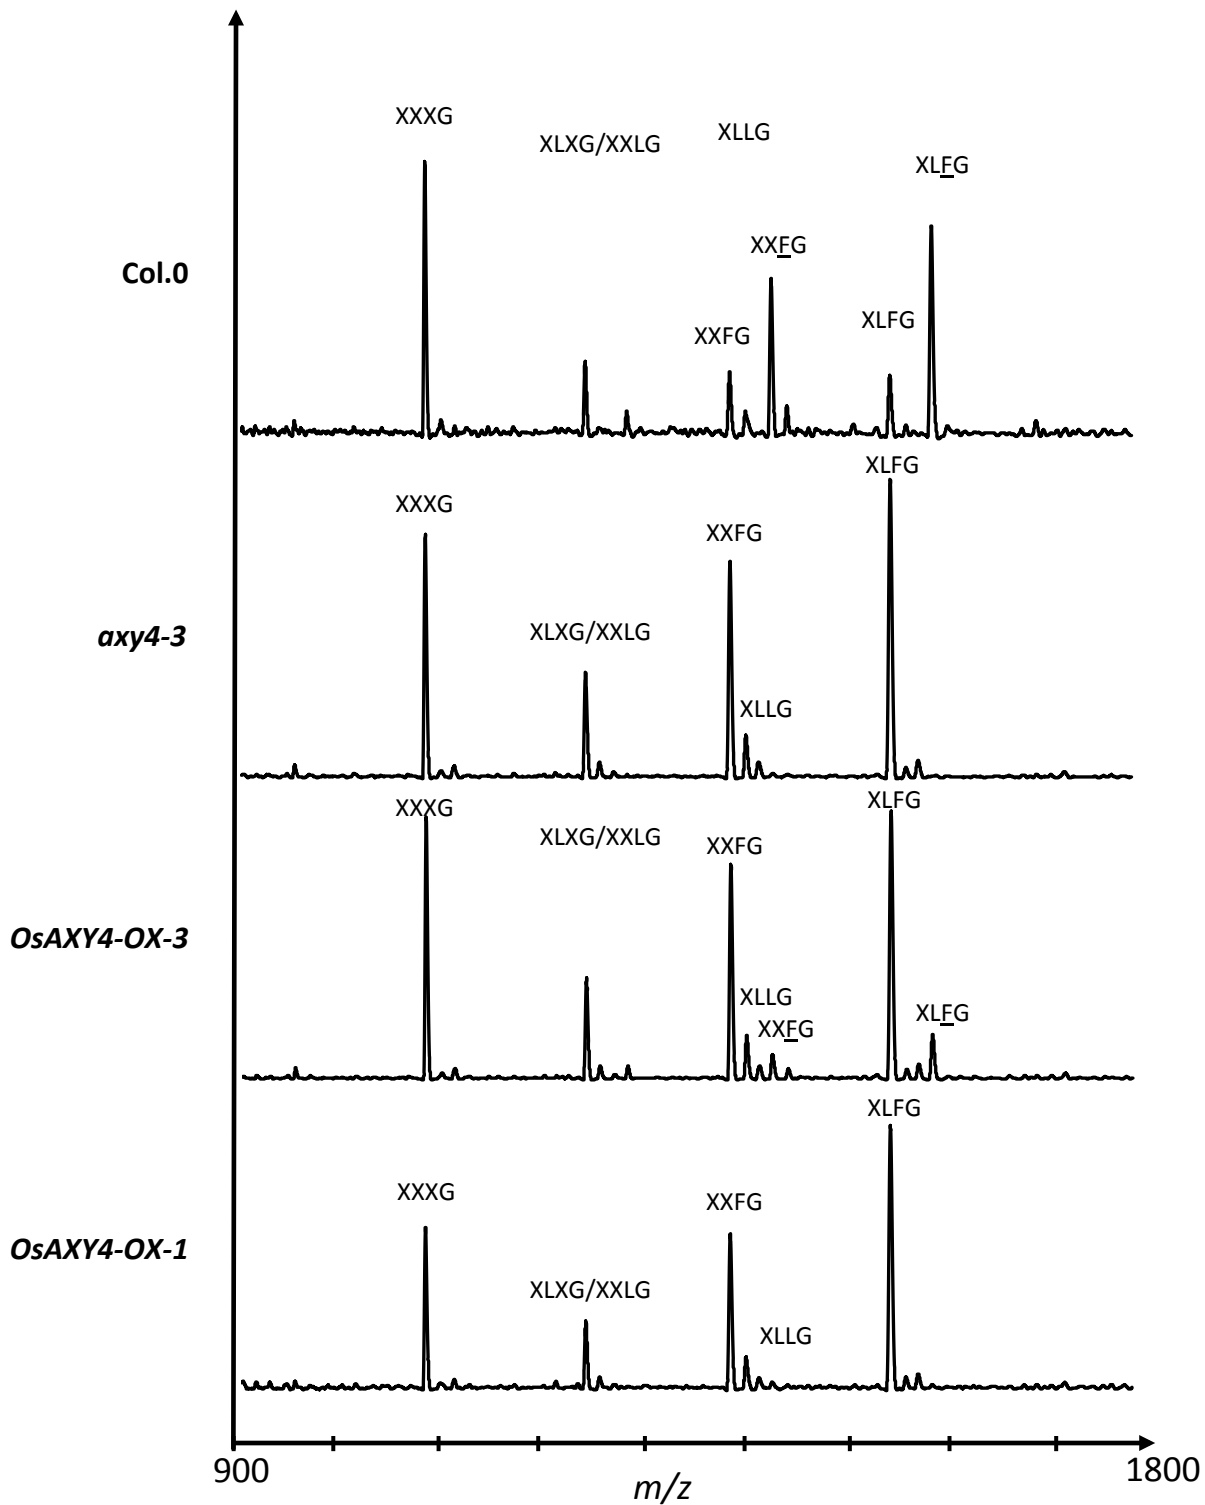

**Supplementary Figure S10.** XyG oligosaccharide mass profiling of 4-week-old leaves from Arabidopsis Col.0, *axy4-3* and *OsAXY4* transformants into the Arabidopsis *axy4-3* mutant. Two representative lines of the *OsAXY4* transformants are shown here. OX, independent overexpression line.

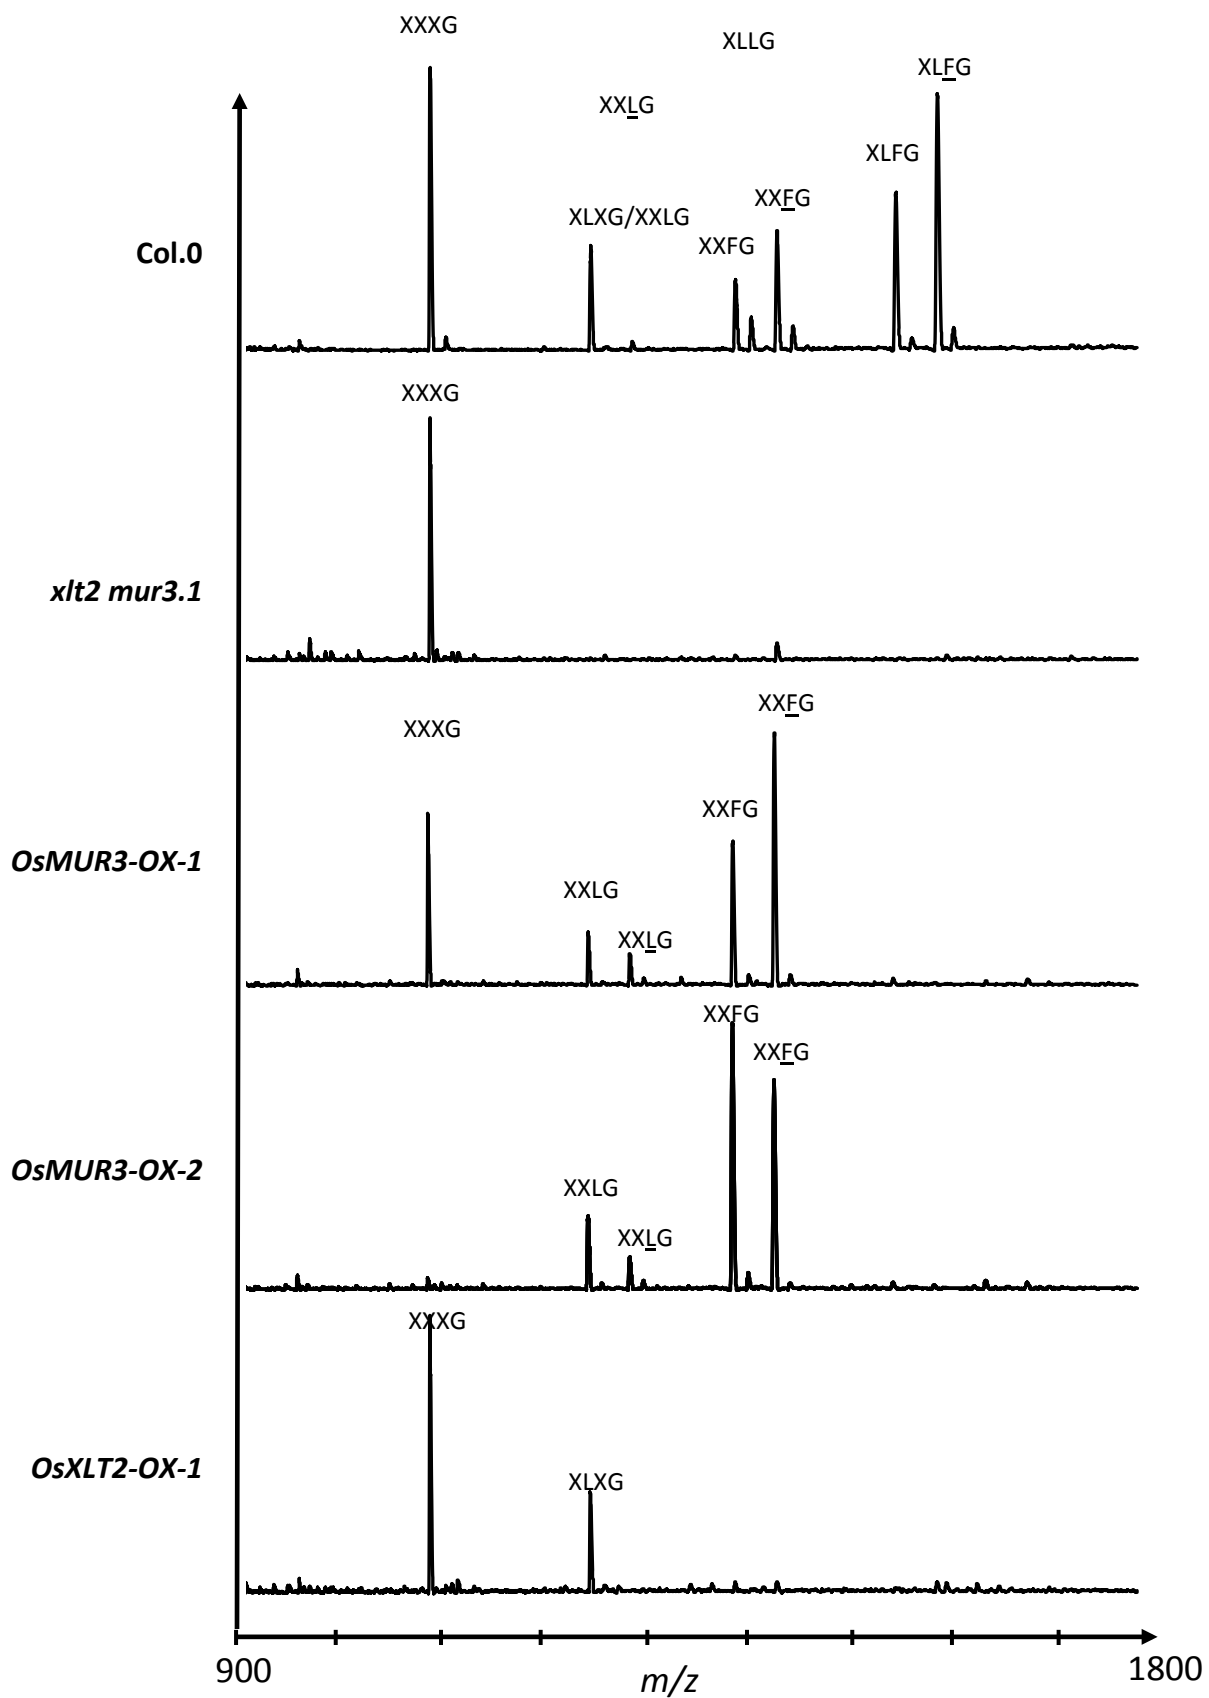

**Supplementary Figure S11.** XyG oligosaccharide mass profiling of 4-week-old leaves from *Arabidopsis* Col.0, *xlt2 mur3.1*, *OsMUR3* and *OsXLT2* transformants into the *Arabidopsis xlt2 mur3* mutant. Two representative lines of *OsMUR3* and one *OsXLT2* transformant is shown here. OX, independent overexpression line.

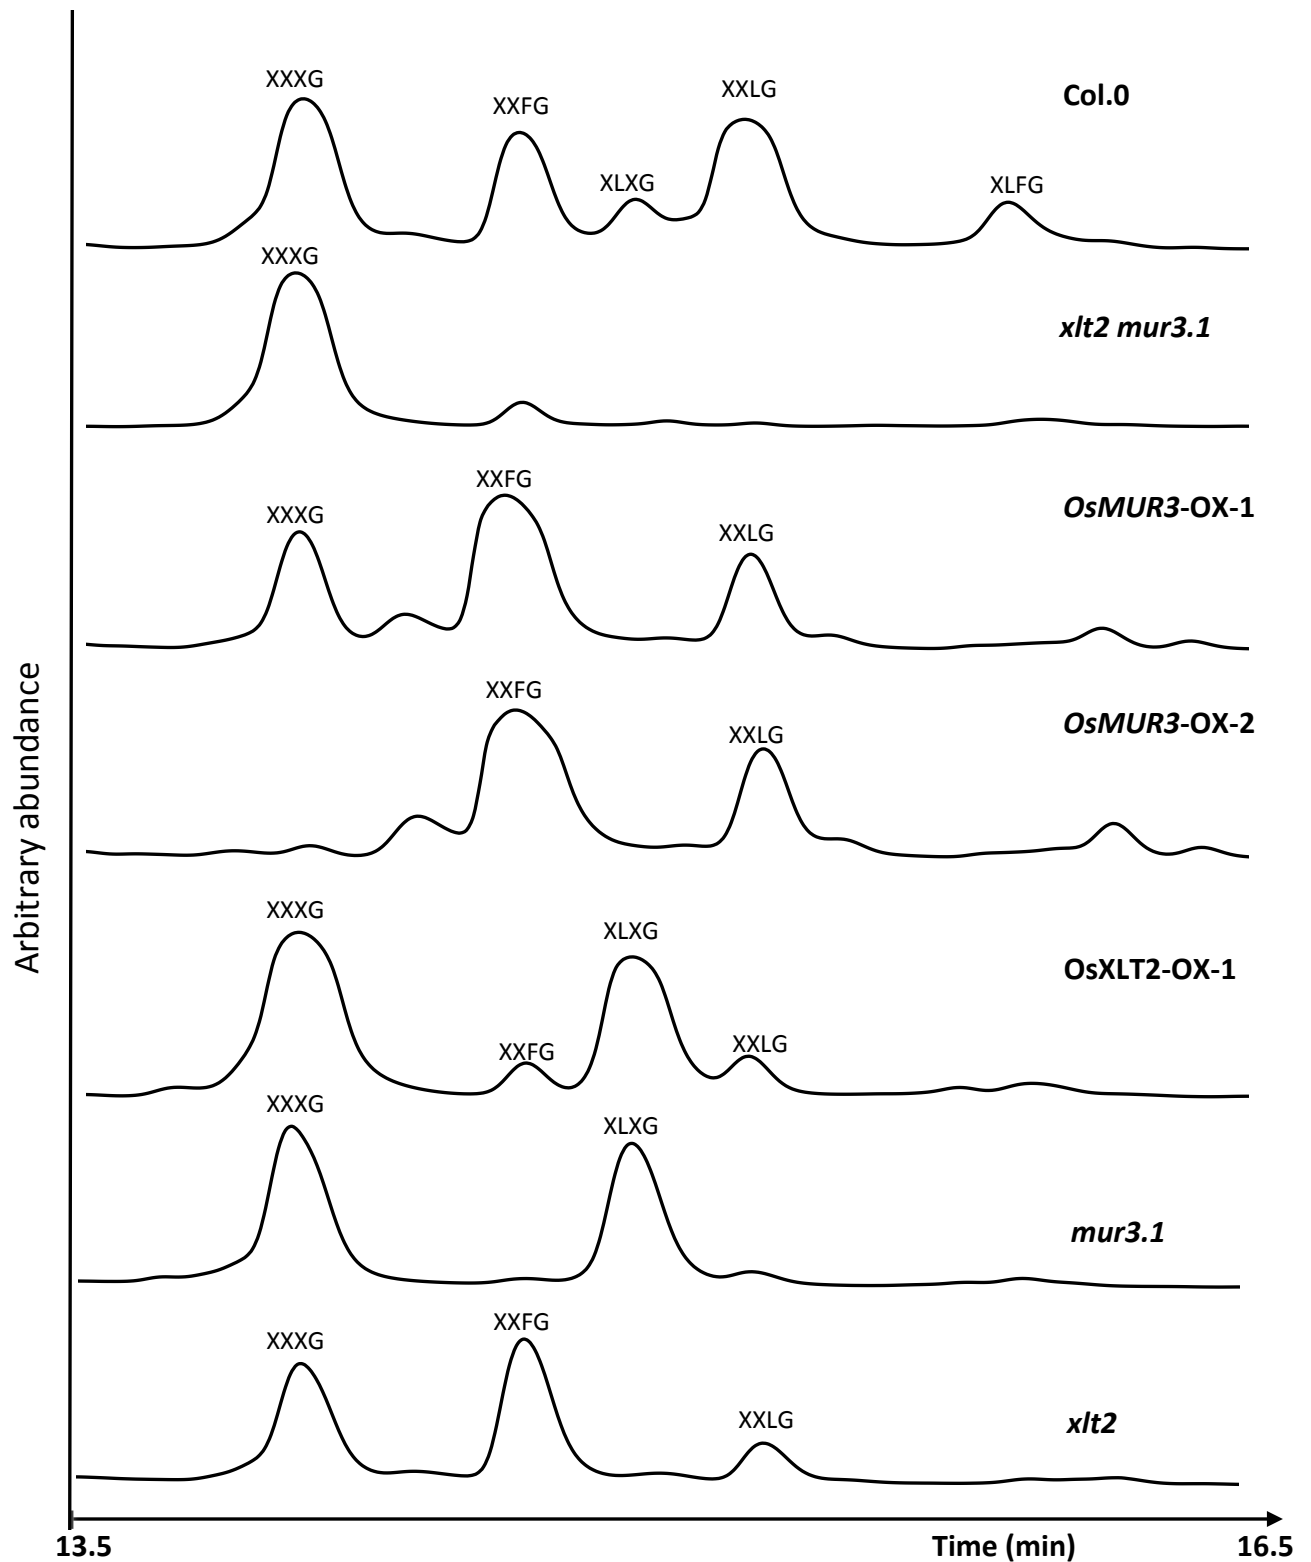

**Supplementary Figure S13.** XyG HPAEC spectra derived from walls of 4-week-old leaves from Col.0, *xlt2 mur3.1*, and *OsMUR3* and *OsXLT2* transformed into the *Arabidopsis xlt2 mur3* mutant. XyG oligosaccharides were identified based on their retention time and annotated as described in the text. *mur3.1* and *xlt2* were used as controls. Two representative lines of *OsMUR3* and one *OsXLT2* transformant is shown here. OX, independent overexpression line.

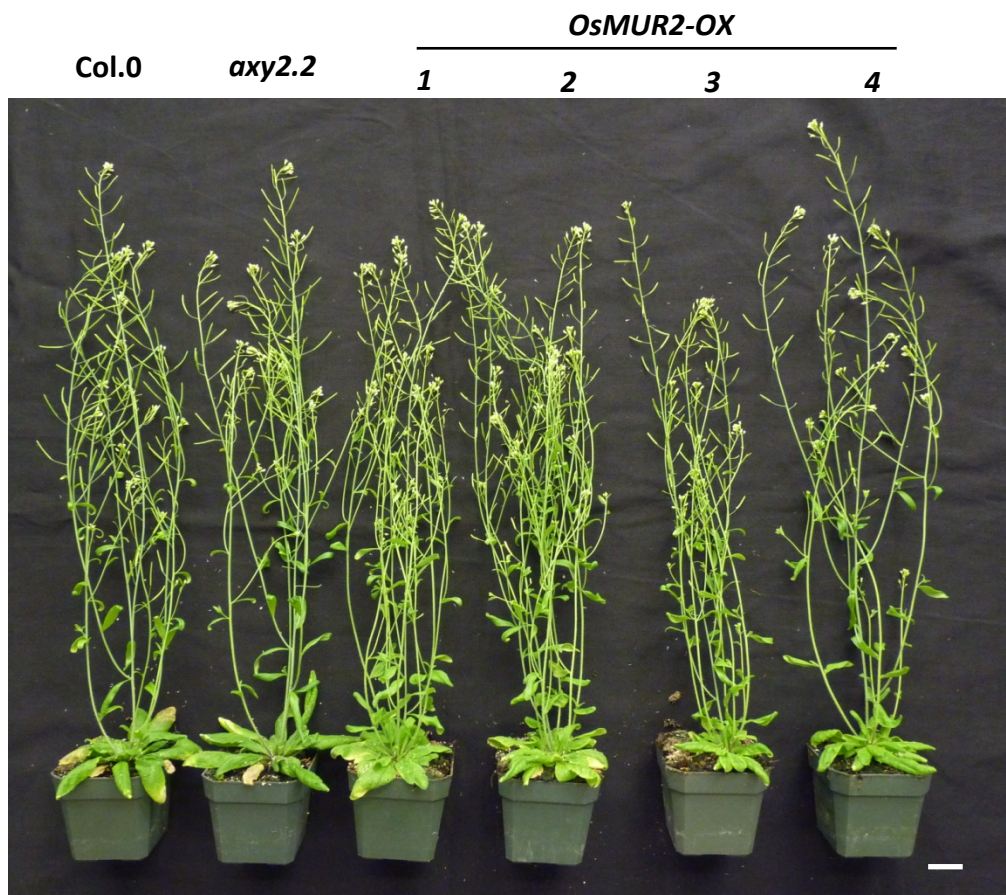

**Supplementary Figure S14.** Phenotype of 7-week-old plants of *Col.0*, *axy2.2* and *OsMUR2* transformed into the Arabidopsis *axy2.2* mutant. One representative plant from each line is shown here. OX, independent overexpression line. Bar=2 cm.

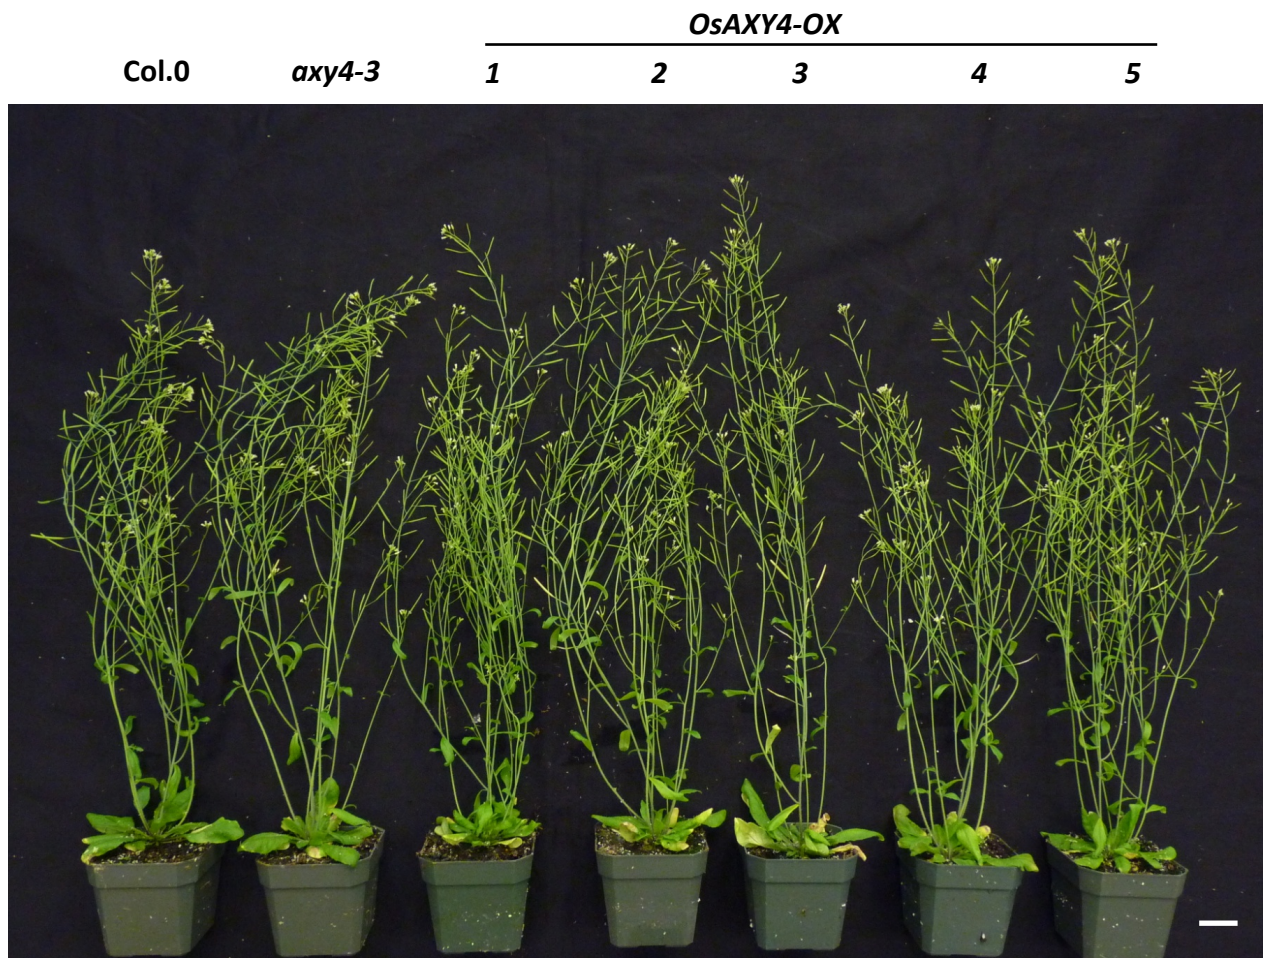

**Supplementary Figure S13.** Phenotype of 7-week-old plants of *Col.0*, *axy4-3* and *OsAXY4* transformed into the Arabidopsis *axy4-3* mutant. One representative plant from each line is shown here. OX, independent overexpression line. Bar=2 cm.



```

1      10      20      30      40      50      60      70      80      90      100     110     120     130
|-----|-----|-----|-----|-----|-----|-----|-----|-----|-----|-----|-----|
AtFUT1_AT2603220      MDQNSYRRRSPPIRITTTGGSKSYNFSELLQMKYLSGTMKLTFTFTTCLIVFSLVAFSMIFHQHPSDSNRMINGFAEA--RVLDAGVFPNVTNINSOKLLGGLLAGGFDESDCLS
LOC_Os02g52630      MQVQQRKPKACAESAAARAGADQQCDGRPLEAGEESLERSVPRKRKPAARVAARAEKRMSVAYVYVLAFAFMATVFAYLGGRRPAYVIAATKALRRGSDDKSIP-LARSAADKLLGGLLEGFDEKSCRS
LOC_Os02g52640
Consensus      .....r...g...s...s...k.....r.....v...v.....a...r...d...p.....dkllgll..gfde.sc.s

131    140    150    160    170    180    190    200    210    220    230    240    250    260
|-----|-----|-----|-----|-----|-----|-----|-----|-----|-----|-----|-----|
AtFUT1_AT2603220      RYQSVHYRKPSYPKSSYLISKLRNYEKLHKRCGPTESYKALKQLDQ-----EHTDGDGCKEYVVIHSFSGLGNRILSLASVFLYALLTDRVLLVDRGKNDLDFCEPFLGHSULLPLDFPMTDQF
LOC_Os02g52630      RYESYLRRNPGRRPSPHLVARLRHHEELQRRCGPNTESYNRAVQRLRDGGAAHEADAHSPDDECKYVVSISYRGLGNRILAAASAFLYAVLIGRVLLVDPNSNDELDFCEPFGITALLPRDFPLASSY
LOC_Os02g52640      HECNYLVHVAYSGLGNRILTHASAFLYAILTRRVLLVDSDKGTADLDFCEPFPETSALLPPKFI-KQF
Consensus      ry.s.yr.....ps.l...lr..e.l.rcgp.tesy..a...l.....h...d.#CkYvVw!s%sgLGNRIL..ASaFLYA.LT.RVLLVD..k.kd#LFCEPFpgtSULLP.dFP...q%

261    270    280    290    300    310    320    330    340    350    360    370    380    390
|-----|-----|-----|-----|-----|-----|-----|-----|-----|-----|-----|-----|
AtFUT1_AT2603220      DGLNQESSRCYGYHVKQVIDTEGTL-----SHLYLHLVHDYGDHDKHFFCEGDQTFIGKVPMLIVKTDNYFVPSLWLPFGFDEELNKLFPQKATVFHHLGRYLFHPTNQVHGLVTRYEYRSLH
LOC_Os02g52630      ANFSADTAESYGNMLKNKVLGTDGSDGDMPPAQMFAFAYLHLDHDYGDGDKHFFCDDQRLLSNIQALVHRTDITYVPSLFLVTTFQDELDALFPERDAVFHHLGRYLFHPANHVHGLVARYRYRAYLAT
LOC_Os02g52640      KNFSGSPESYGNMLKNKAIKRSN-----PAFLYLHMAHDYSDYDKLFFCEDNQQLRNIPHLILKSDNYFVPSLFLIPAYQEELTRLFPQRDSVFHHLGRYLFHPSNVVHGLVTRYDYSLAR
Consensus      .nfs...s.esYGnMlKkvi.t#g.....pafLYLH#.HDYGD.DK#FFC#d#Q...l.n!pHL!.ktDnYFVPSLFL!p.%#EL...LFP#rd.VFHHLGRYLFHP.N.VHG#VtRY.YaLa

391    400    410    420    430    440    450    460    470    480    490    500    510    520
|-----|-----|-----|-----|-----|-----|-----|-----|-----|-----|-----|-----|
AtFUT1_AT2603220      ADEKIGIQRYVFOEDPGPFQHV-HDQISSCTQKEKLLPEYDTLVERSR-----HVNTPKHKAVLYTSLNAGYAENLKSNIWEYPTSTGEIIGVHQPSEQEYQTEKKHNGKALAEYLLSLDNLV
LOC_Os02g52630      ARQLVGVQRYVFOHRQAKSPHVLEQITSCAMKEKLLPEYLDVDAAMPPTPTTPHG6SNMSKAVLITSLRPFVYERYKANIYERATAGEOVSVHQPSEHEYQHFGKESHGDKAEMVLLSLDNLV
LOC_Os02g52640      ADERLGIQIRYVFOPEPQFQHV-LDQYLACTLKENLLPAINSKPIVS-----TRHSRLKSVLITSLNSGYEYKIRSHYNEHPTTNGEMISFHQPSHEEHQNSDKKHNNKAWAEIYLLSLDVMY
Consensus      Ad#..G!Q!RVFD..pgpfqHV.#Q!.sCt.KEkLLPe!...ve.....h.....KaVlITSLn.gYE..ksNYWE.pt.tGE.!svHQPShEeyQ...kK#H#gKAWAEYLLSL.Dv#Y

521    530    540    550    560    570    580    590    600    609
|-----|-----|-----|-----|-----|-----|-----|-----|-----|-----|
AtFUT1_AT2603220      TSAHSTFGYVAQGLGGLKPAILYRPNRTT-PPDSCGRAMSHPECFHSPFFYDCKAKTGIDT6TLVPHVHRCEDISHGLKLY
LOC_Os02g52630      TSGHSTFGYVAQGLGGLRPWHYKPYNIIRYVDPDPCGRDYSMEPCFHSPPFYDCKTKRGVDT6TILPHVHRCDDVSHGLKLYDPPNGSPN
LOC_Os02g52640      TSAHSTFGYVAQGLSGLRPALLFKPENRTA-PPDPCRQVLSMEPCFHSPFFYDCKAKRGADTGKFPYVSHCEDHSHGLKLYDQSEM
Consensus      TSAHSTFGYVAQGLgGLrPW.#%kPeRta.PDPPcGr..SMEPCFHSPFFYDCKaKrG.DT6t.vPhVrHC#D.SHGLKLYd.....

```

**Supplementary Figure S15.** Sequence alignment of AtFUT1/MUR2 with Os02g52630/OsMUR2 and Os02g52640. Protein sequences are downloaded from TAIR ([www.arabidopsis.org](http://www.arabidopsis.org)) and rice.plantbiology.msu.edu. Sequence alignment is done with the Multialign software at <http://multalin.toulouse.inra.fr/multalin/cgi-bin/multalin.pl> (Corpet, 1998).

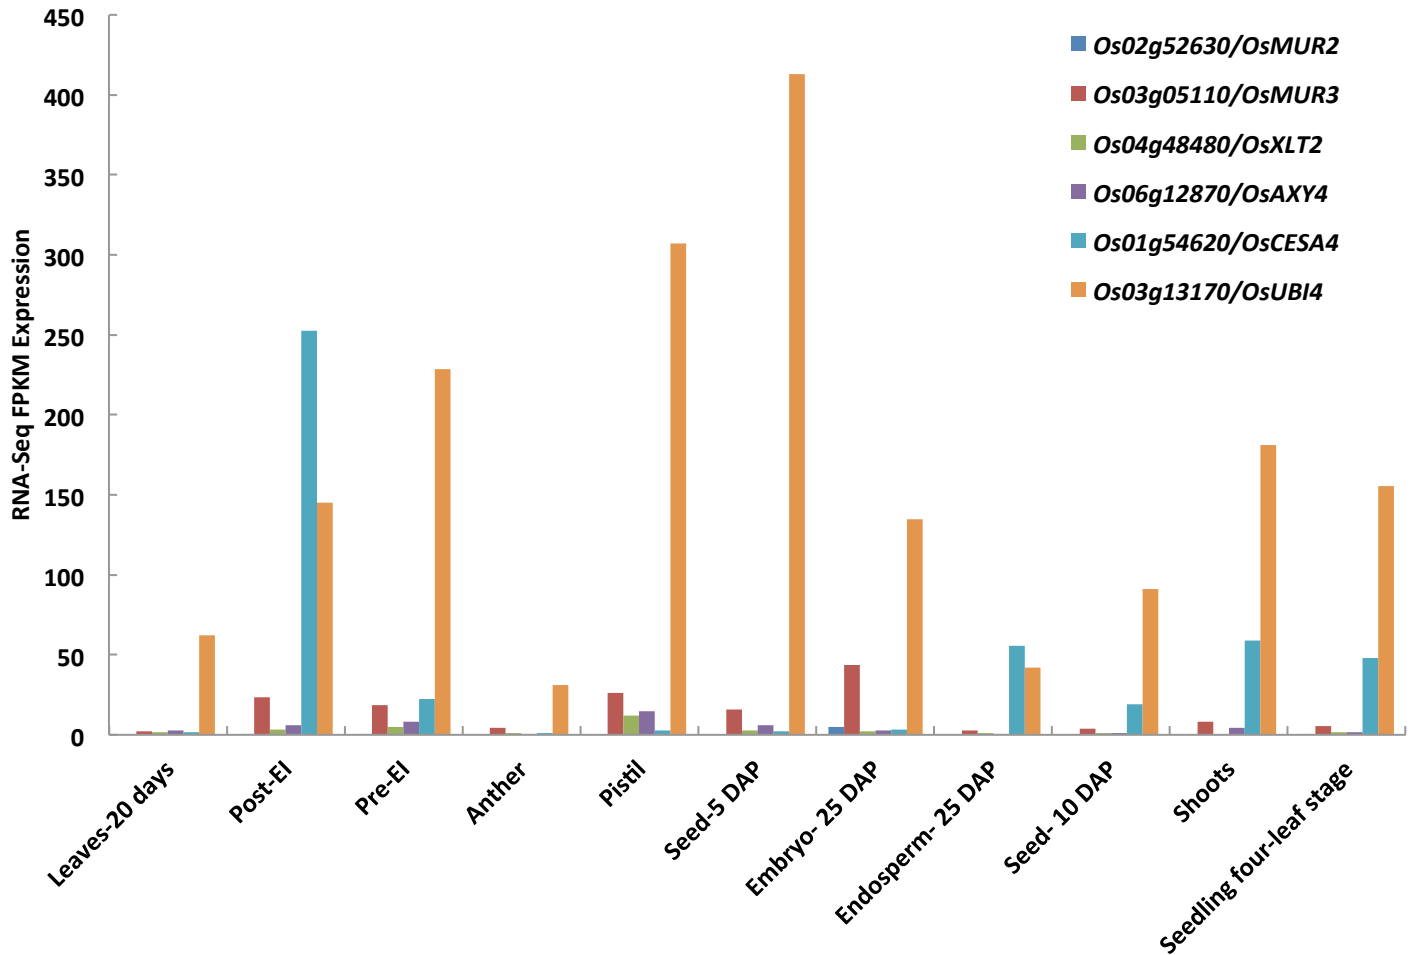

**Supplementary Figure S16.** RNA-Seq FPKM expression values of rice genes in different tissues. RNA seq data was downloaded from [rice.plantbiology.msu.edu](http://rice.plantbiology.msu.edu). FPKM, fragments per kilobase of exon per million fragments mapped. EI, emergence inflorescence. DAP, day after pollination. *OsCESA4* and *OsUBI4* are used as controls.
