# Supplementary material
Source: PubMed Central journal article supplement (PMC4453794)
Supplement: supp_pp.15.00441_00441Supplementarymaterialrev515.pdf [file supp_pp.15.00441_00441Supplementarymaterialrev515.pdf]

## Supplementary Data

**Supplementary Figure S1.** HPAEC-PAD analysis of XyG derived from different tissues. XXXG heptasaccharide and XEG digest oligosaccharides from Arabidopsis are used as controls. XyG oligosaccharides are annotated using the one-letter code nomenclature described by Fry et al., 1993.

**Supplementary Figure S2.** Immunofluorescent labeling of rice 3-day-old root and shoot transverse sections with different antibodies. (A) to (C) Rice root cross-sections labeled with CCRC-M1 (A), CCRC-M48 (B), LM11 (C). (D) to (F) Rice shoot cross-sections labeled with CCRC-M1 (D), CCRC-M48 (E), LM11 (F). CCRC-M1 recognizes fucosylated xyloglucan; CCRC-M48 recognizes non-fucosylated xyloglucan; LM11 recognizes xylan. Bar=50  $\mu$ m

**Supplementary Figure S3.** Phylogenetic tree of MUR2 homologs in Arabidopsis, rice and Brachypodium. Genes shown in Table 1 are highlighted in yellow. Homologs were identified from Phytozome (<http://www.phytozome.net>). Bootstrap values are shown.

**Supplementary Figure S4.** Phylogenetic tree of AXY4 homologs in Arabidopsis, rice and Brachypodium. Homologs were identified from Phytozome (<http://www.phytozome.net>) and only protein sequences from TBL17-TBL27 subclade were shown here. Genes listed in Table 1 are marked in yellow. Bootstrap values are shown.

**Supplementary Figure S5.** Phylogenetic tree of MUR3 and XLT2 homologs in Arabidopsis, rice and Brachypodium. Homologs were identified from Phytozome (<http://www.phytozome.net>). Genes listed in Table 1 are marked in yellow. Bootstrap values are shown.

**Supplementary Figure S6.** XyG oligosaccharide mass profiling of 4-week-old leaves from Arabidopsis Col.0, *axy2.2/fut1* and *OsMUR2* transformants into *axy2.2* mutant. One representative line of *OsMUR2* transformants was shown here. OX, independent overexpression line.

**Supplementary Figure S7.** Xyloglucan HPAEC spectra derived from cell wall of 4-week-old leaves from Col.0, *axy2.2* and *OsMUR2* transformants into *axy2.2* mutant. One representative line of *OsMUR2* transformants was shown here. OX, independent overexpression line.

**Supplementary Figure S8.** RT-PCR analysis of total RNA extracted from 4-week-old leaves of Arabidopsis wild-type (Col.0), mutants and all transformants (*OsMUR2*-OX-*axy2.2*, *OsAXY4*-OX-*axy4-3*, *OsXLT2*-OX-*xlt2 mur3* and *OsMUR3*-OX-*xlt2 mur3*). The RT-PCR was performed

using specific primers for each gene (See Supplementary Table S5). *AtPTB* transcript as a reference gene shown on lower panel. OX, overexpress. NCK, no template control.

**Supplementary Figure S9.** XyG oligosaccharide mass profiling of 4-week-old leaves from Arabidopsis Col.0, rice homologs of *AtMUR2* transformants into *axy2.2* mutant. One representative line of transformants was shown here. OX, independent overexpression line.

**Supplementary Figure S10.** XyG oligosaccharide mass profiling of 4-week-old leaves from Arabidopsis Col.0, *axy4-3* and *OsAXY4* transformants into *axy4-3* mutant. Two representative lines of *OsAXY4* transformants were shown here. OX, independent overexpression line.

**Supplementary Figure S11.** XyG oligosaccharide mass profiling of 4-week-old leaves from Arabidopsis Col.0, *xlt2 mur3.1*, *OsMUR3* and *OsXLT2* transformants into *xlt2 mur3* mutant. Two representative lines of *OsMUR3* and one *OsXLT2* transformants were shown here. OX, independent overexpression line.

**Supplementary Figure S12.** XyG HPAEC spectra derived from cell wall of 4-week-old leaves from Col.0, *xlt2 mur3.1*, *OsMUR3* and *OsXLT2* transformants into *xlt2 mur3* mutant. Xyloglucan oligosaccharides were identified based on their retention time and annotated as described in text. *mur3.1* and *xlt2* were used here as controls. Two representative lines of *OsMUR3* and one *OsXLT2* transformants were shown here. OX, independent overexpression line.

**Supplementary Figure S13.** Phenotype of 7-week-old plants of *Col.0*, *axy2.2* and *OsMUR2* transformants into *axy2.2* mutant. One representative plant from each line is shown here. OX, independent overexpression line. Bar=2 cm.

**Supplementary Figure S14.** Phenotype of 7-week-old plants of *Col.0*, *axy4-3* and *OsAXY4* transformants into *axy4-3* mutant. One representative plant from each line was shown here. OX, independent overexpression line. Bar=2 cm.

**Supplementary Figure S15.** Sequence alignment of AtFUT1/MUR2 with Os02g52630/OsMUR2 and Os02g52640. Protein sequences are downloaded from TAIR ([www.arabidopsis.org](http://www.arabidopsis.org)) and rice.plantbiology.msu.edu. Sequence alignment is done with the Multialign software at <http://multalin.toulouse.inra.fr/multalin/cgi-bin/multalin.pl> (Corpet, 1998).

**Supplementary Figure S16.** RNA-Seq FPKM expression values of rice genes in different tissues. RNA seq data were downloaded from rice.plantbiology.msu.edu. FPKM, fragments per kilobase of exon per million fragments mapped. EI, emergence inflorescence. DAP, day after pollination. *OsCESA4* and *OsUBI4* were used here as controls.

**Supplementary Table S1.** List of *m/z* with known or predicted XyG structures shown in this study.

| <i>m/z</i> | Oligosaccharide composition | Known or predicted XyG structure |
|------------|-----------------------------|----------------------------------|
| 995        | P2H4Ac1                     | XXGG                             |
| 1085       | P3H4                        | XXXG                             |
| 1157       | P2H5Ac1                     | XXGGG, XXGGG, XLGG, XLGG         |
| 1199       | P2H5Ac2                     | XXGGG, XLGG                      |
| 1217       | P4H4                        | XXSG, XXBG                       |
| 1247       | P3H5                        | XLXG, XXLG, XXXGG                |
| 1289       | P3H5Ac1                     | XXLG, XXXGG                      |
| 1361       | P2H6Ac2                     | XXGGGG, XLGGG, LLGG              |
| 1393       | P3H5H <sub>de</sub> 1       | XXFG                             |
| 1403       | P2H6Ac3                     | XXGGGG, XLGGG, LLGG              |
| 1409       | P3H6                        | XLLG, XLXGG, XXLGG, XXXGGG       |
| 1435       | P3H5H <sub>de</sub> 1Ac1    | XXFG                             |
| 1451       | P3H6Ac1                     | XLG,XXLGG,XXLGG,XXXGGG,XXXGGG    |
| 1555       | P3H6H <sub>de</sub> 1       | XLFG, XXFGG                      |
| 1597       | P3H6H <sub>de</sub> 1Ac1    | XLFG,XXFGG,XXFGG                 |

Note: P, pentose; H, hexose; H<sub>de</sub>, deoxy hexose; Ac, acetate.

**Supplementary Table S2.** List of top 50 coexpressed genes with *OsCSLC3*.

| R-value | Array                  | Gene Locus | Annotation                                                                                                                                                                                                                                                                  |
|---------|------------------------|------------|-----------------------------------------------------------------------------------------------------------------------------------------------------------------------------------------------------------------------------------------------------------------------------|
| 1       | OsAffx.17009.1.S1_x_at | os08g15420 | #UniProt: Probable xyloglucan glycosyltransferase 3 n #Rice: cDNA CSLC3 cellulose synthase like family C, expressed #Arabidopsis: ATCSLC5 (CELLULOSE SYNTHASE LIKE C5); cellulose synthase/ transferase, transferring glycosyl groups                                       |
| 0.92776 | OsAffx.24868.1.S1_at   | os02g54570 | #UniProt: Putative uncharacterized protein n #Rice: cDNA SCP like extracellular protein, expressed #Arabidopsis: pathogenesis related protein, putative                                                                                                                     |
| 0.92181 | Os.53995.1.S1_at       | os06g44970 | #UniProt: Probable auxin efflux carrier component 2 n #Rice: cDNA auxin efflux carrier component, putative, expressed #Arabidopsis: EIR1 (ETHYLENE INSENSITIVE ROOT 1); auxin efflux transmembrane transporter/ auxin:hydrogen symporter/ transporter                       |
| 0.92178 | OsAffx.26451.1.S1_at   | os04g44130 | #UniProt: OSIGBa0131L05.12 protein n #Rice: cDNA DEF12 Defensin and Defensin like DEFL family, expressed #Arabidopsis: PDF2.1; peptidase inhibitor                                                                                                                          |
| 0.92007 | OsAffx.30244.1.S1_x_at | os10g02500 | #UniProt: Putative uncharacterized protein n #Rice: cDNA serine/threonine protein kinase BRI1 like 2 precursor, putative, expressed #Arabidopsis: BRL2 (BRI1 LIKE 2); ATP binding / protein serine/threonine kinase/ transmembrane receptor protein serine/threonine kinase |
| 0.91766 | Os.54044.1.S1_at       | os05g04690 | #UniProt: Putative uncharacterized protein n #Rice: cDNA CHIT11 Chitinase family protein precursor, expressed #Arabidopsis: chitinase, putative                                                                                                                             |
| 0.91346 | OsAffx.15442.1.S1_at   | os06g15600 | #UniProt: Putative chemocyanin (Putative uncharacterized protein) n #Rice: cDNA plastocyanin like domain containing protein, putative, expressed #Arabidopsis:                                                                                                              |

|         |                        |                         |                                                                                                                                                                                                                                                                             |
|---------|------------------------|-------------------------|-----------------------------------------------------------------------------------------------------------------------------------------------------------------------------------------------------------------------------------------------------------------------------|
|         |                        |                         | ARPN (PLANTACYANIN); copper ion binding / electron carrier                                                                                                                                                                                                                  |
| 0.91281 | OsAffx.30244.1.S1_at   | os10g02500              | #UniProt: Putative uncharacterized protein n #Rice: cDNA serine/threonine protein kinase BRI1 like 2 precursor, putative, expressed #Arabidopsis: BRL2 (BRI1 LIKE 2); ATP binding / protein serine/threonine kinase/ transmembrane receptor protein serine/threonine kinase |
| 0.91281 | OsAffx.14196.1.S1_at   | os04g38860              | #UniProt: OSJNBa0072F16.19 protein (Os04g0462400 protein) (B1358B12.11 protein) n #Rice: cDNA expressed protein #Arabidopsis: lysine and histidine specific transporter, putative                                                                                           |
| 0.91014 | OsAffx.18476.1.S1_at   | os10g31540              | #UniProt: Expressed protein (Putative uncharacterized protein) (Os10g0453000 protein) n #Rice: cDNA glycine rich cell wall structural protein 2 precursor, putative, expressed #Arabidopsis: glycine rich protein                                                           |
| 0.90958 | OsAffx.24060.1.S1_at   | os02g02160              | #UniProt: Putative uncharacterized protein n #Rice: cDNA expressed protein #Arabidopsis: FUNCTIONS IN: molecular_function unknown; INVOLVED IN: biological_process unknown; LOCATED IN: cellular_component unknown; EXPR                                                    |
| 0.90792 | Os.18683.1.S1_at       | os06g44280              | #UniProt: Fibroin heavy chain like (Putative uncharacterized protein) (Os06g0652600 protein) n #Rice: cDNA retrotransposon protein, putative, Ty3 gypsy subclass, expressed #Arabidopsis: unknown protein                                                                   |
| 0.90607 | Os.55806.1.S1_at       | os05g20930              | #UniProt: Os05g0286100 protein n #Rice: cDNA ZOS5 07 C2H2 zinc finger protein, expressed #Arabidopsis: nucleic acid binding / transcription factor/ zinc ion binding                                                                                                        |
| 0.90452 | Os.7659.1.S1_s_at      | os08g38560              | #UniProt: Chromosome chr19 scaffold_66, whole genome shotgun sequence n #Rice: cDNA receptor like protein kinase 2 precursor, putative, expressed #Arabidopsis: leucine rich repeat protein kinase, putative                                                                |
| 0.90392 | OsAffx.24414.1.S1_at   | os02g25020              | #UniProt: Putative uncharacterized protein n #Rice: cDNA DNA binding protein, putative, expressed #Arabidopsis: DNA binding protein related                                                                                                                                 |
| 0.90351 | OsAffx.4884.1.S1_at    | os06g20570              | #UniProt: Putative uncharacterized protein n #Rice: cDNA glycosyltransferase, putative, expressed #Arabidopsis: transferase, transferring glycosyl groups                                                                                                                   |
| 0.90332 | Os.18755.1.S1_at       | os04g39230              | #UniProt: OSJNBa0016O02.5 protein (OSIGBa0115M15.8 protein) n #Rice: cDNA expressed protein                                                                                                                                                                                 |
| 0.90299 | Os.55417.1.S1_at       | os08g15420              | #UniProt: Probable xyloglucan glycosyltransferase 3 n #Rice: cDNA CSLC3 cellulose synthase like family C, expressed #Arabidopsis: ATCSLC5 (CELLULOSE SYNTHASE LIKE C5); cellulose synthase/ transferase, transferring glycosyl groups                                       |
| 0.90171 | Os.18711.1.S1_at       | os10g31530              | #UniProt: Expressed protein (Putative uncharacterized protein) (Os10g0452900 protein) n #Rice: cDNA glycine rich cell wall protein, putative, expressed #Arabidopsis: glycine rich protein                                                                                  |
| 0.90098 | OsAffx.27322.1.S1_s_at | os05g45480              | #UniProt: Putative uncharacterized protein OJ1131_E09.17 n #Rice: cDNA POEI45 Pollen Ole e I allergen and extensin family protein precursor, expressed #Arabidopsis: pollen Ole e 1 allergen and extensin family protein                                                    |
| 0.90005 | Os.53691.1.S1_at       | os03g05060 <sup>1</sup> | #UniProt: Xyloglucan galactosyltransferase KATAMARI 1, putative, expressed (Os03g0144300 protein) n #Rice: cDNA exostosin family domain containing protein, expressed #Arabidopsis: MUR3 (MURUS 3); catalytic/ transferase, transferring glycosyl groups                    |
| 0.89693 | OsAffx.2887.1.S1_at    | os02g37100              | #UniProt: Putative uncharacterized protein n #Rice: cDNA expressed protein                                                                                                                                                                                                  |
| 0.89658 | Os.55091.1.S1_at       | os01g14010              | #UniProt: Putative zinc finger protein ID1 (Os01g0242200 protein) n #Rice: cDNA ZOS1 05 C2H2 zinc finger protein, expressed #Arabidopsis: NUC (nutcracker); nucleic acid binding / transcription factor/ zinc ion binding                                                   |
| 0.89489 | Os.57396.1.S1_at       | os03g60300              | #UniProt: Putative uncharacterized protein n #Rice: cDNA expressed protein #Arabidopsis: unknown protein                                                                                                                                                                    |
| 0.89478 | OsAffx.11944.1.S1_at   | os02g09070              | #UniProt: Putative uncharacterized protein n #Rice: cDNA zinc binding protein, putative, expressed #Arabidopsis: FUNCTIONS IN: molecular_function unknown; INVOLVED IN: biological_process unknown; LOCATED IN: cellular_component unknown; CONTAI                          |
| 0.89285 | OsAffx.19018.1.S1_x_at | os11g25920              | #UniProt: Putative uncharacterized protein n #Rice: cDNA transcription factor related, putative, expressed #Arabidopsis: unknown protein                                                                                                                                    |
| 0.89282 | Os.53625.1.S1_at       | os06g42754              | #UniProt: Putative uncharacterized protein P0505A04.40 (Os06g0634000 protein) n #Rice: cDNA expressed protein                                                                                                                                                               |
| 0.89203 | Os.53616.1.S1_at       | os01g71060              | #UniProt: Putative uncharacterized protein n #Rice: cDNA xylanase inhibitor, putative, expressed #Arabidopsis: aspartic type endopeptidase                                                                                                                                  |

|         |                      |            |                                                                                                                                                                                                                                                                                |
|---------|----------------------|------------|--------------------------------------------------------------------------------------------------------------------------------------------------------------------------------------------------------------------------------------------------------------------------------|
| 0.8912  | Os.54004.1.S1_at     | os12g22800 | #UniProt: Expressed protein (Os12g0416800 protein) n #Rice: cDNA expressed protein #Arabidopsis: unknown protein                                                                                                                                                               |
| 0.89104 | Os.10029.1.S1_at     | os07g44550 | #UniProt: Putative uncharacterized protein n #Rice: cDNA peroxidase precursor, putative, expressed #Arabidopsis: peroxidase, putative                                                                                                                                          |
| 0.891   | Os.57354.1.S1_at     | os04g56500 | #UniProt: OSIGBa0132E09 OSIGBa0108L24.22 protein n #Rice: cDNA expressed protein #Arabidopsis: proline rich family protein                                                                                                                                                     |
| 0.88908 | Os.20535.1.S1_at     | os03g06000 | #UniProt: Expansin A12 n #Rice: cDNA expansin precursor, putative, expressed #Arabidopsis: ATEXPA11 (ARABIDOPSIS THALIANA EXPANSIN 11)                                                                                                                                         |
| 0.88715 | OsAffx.4247.1.S1_at  | os05g04240 | #UniProt: Putative uncharacterized protein n #Rice: cDNA GDSL like lipase/acylhydrolase, putative, expressed #Arabidopsis: GDSL motif lipase/hydrolase family protein                                                                                                          |
| 0.88705 | Os.53557.1.S1_at     | os06g10910 | #UniProt: Putative uncharacterized protein n #Rice: cDNA xyloglucan fucosyltransferase, putative, expressed #Arabidopsis: FT1 (FUCOSYLTRANSFERASE 1); fucosyltransferase/ transferase, transferring glycosyl groups                                                            |
| 0.88494 | Os.49612.1.S1_at     | os02g52630 | #UniProt: Putative uncharacterized protein n #Rice: cDNA xyloglucan fucosyltransferase, putative, expressed #Arabidopsis: FT1 (FUCOSYLTRANSFERASE 1); fucosyltransferase/ transferase, transferring glycosyl groups                                                            |
| 0.88155 | OsAffx.17505.1.S1_at | os08g43770 | #UniProt: Putative uncharacterized protein n #Rice: cDNA carrier, putative #Arabidopsis: unknown protein                                                                                                                                                                       |
| 0.88111 | Os.54057.1.S1_at     | os06g23420 | #UniProt: Putative xyloglucan galactosyltransferase (Os06g0342000 protein) n #Rice: cDNA exostosin family domain containing protein, expressed #Arabidopsis: exostosin family protein                                                                                          |
| 0.88017 | Os.36470.1.S1_at     | os07g15320 | #UniProt: Leaf senescence related protein like protein (Putative uncharacterized protein) (Os07g0256700 protein) n #Rice: cDNA leaf senescence related protein, putative, expressed #Arabidopsis: unknown protein                                                              |
| 0.87973 | Os.56849.1.S1_x_at   | os03g22600 | #UniProt: Transposon protein, putative, Mutator sub class, expressed (Os03g0347700 protein) n #Rice: cDNA BTBN6 Bric a Brac, Tramtrack, Broad Complex BTB domain with non phototropic hypocotyl 3 NPH3 and coiled coi #Arabidopsis: phototropic responsive NPH3 family protein |
| 0.87926 | Os.49859.1.S1_at     | os02g40070 | #UniProt: Putative uncharacterized protein n #Rice: cDNA AP2 like ethylene responsive transcription factor PLETHORA 2, putative, expressed #Arabidopsis: PLT2 (PLETHORA 2); transcription factor                                                                               |
| 0.87866 | Os.50694.1.S1_at     | os04g41710 | #UniProt: OSIGBa0103O01.7 protein n #Rice: cDNA expressed protein #Arabidopsis: FUNCTIONS IN: molecular_function unknown; INVOLVED IN: biological_process unknown; LOCATED IN: cell wall, plant type cell wall; E                                                              |
| 0.8783  | Os.33904.1.S1_at     | os01g14540 | #UniProt: Os01g0248000 protein (Fragment) n #Rice: cDNA STIGL1 Stigma specific Stig1 family protein precursor, expressed #Arabidopsis: Encodes a Stigma specific Stig1 family protein                                                                                          |
| 0.87707 | Os.49220.1.S1_at     | os09g12970 | #UniProt: Os09g0300800 protein n #Rice: cDNA plant protein of unknown function domain containing protein, expressed #Arabidopsis: unknown protein                                                                                                                              |
| 0.87474 | OsAffx.29094.1.S1_at | os08g08020 | #UniProt: Putative uncharacterized protein n #Rice: cDNA expressed protein #Arabidopsis: unknown protein                                                                                                                                                                       |
| 0.87444 | Os.29907.1.S1_at     | os01g48800 | #UniProt: Purine permease like protein (Os01g0680200 protein) n #Rice: cDNA purine permease, putative, expressed #Arabidopsis: ATPUP4; purine transmembrane transporter                                                                                                        |
| 0.87395 | OsAffx.3069.1.S1_at  | os02g54450 | #UniProt: Putative uncharacterized protein OJ1715_H01.38 (Putative uncharacterized protein OJ1316_E06.1) n #Rice: cDNA hypro1, putative, expressed #Arabidopsis: transferase, transferring glycosyl groups                                                                     |
| 0.87371 | OsAffx.27695.1.S1_at | os06g18880 | #UniProt: Embryogenesis transmembrane protein like (Os06g0292100 protein) n #Rice: cDNA cadmium tolerance factor, putative #Arabidopsis: ankyrin repeat family protein                                                                                                         |
| 0.87267 | OsAffx.25840.1.S1_at | os04g02560 | #UniProt: Os04g0115900 protein n #Rice: cDNA expressed protein #Arabidopsis: SR33; RNA binding / protein binding                                                                                                                                                               |

|         |                      |            |                                                                                                                                                                                                                             |
|---------|----------------------|------------|-----------------------------------------------------------------------------------------------------------------------------------------------------------------------------------------------------------------------------|
| 0.87243 | Os.56930.1.S1_at     | os03g17220 | #UniProt: Os03g0280700 protein n #Rice: cDNA dirigent, putative, expressed<br>#Arabidopsis: disease resistance responsive family protein / fibroin related                                                                  |
| 0.87144 | OsAffx.14236.1.S1_at | os04g42040 | #UniProt: Putative uncharacterized protein n #Rice: cDNA expressed protein<br>#Arabidopsis: FUNCTIONS IN: molecular_function unknown; INVOLVED IN: biological_process unknown; LOCATED IN: cellular_component unknown; EXPR |
| 0.87018 | OsAffx.17916.1.S1_at | os09g26910 | #UniProt: Putative uncharacterized protein OJ1344_B01.32 n #Rice: cDNA hypothetical protein #Arabidopsis: unknown protein                                                                                                   |

<sup>1</sup> Putative xyloglucan biosynthesis genes are marked in red.

**Supplementary Table S3.** Relative quantification of XyG oligosaccharide profile of *Col.0*, *axy2.2* and *OsMUR2* transformed into the Arabidopsis *axy2.2*.

|              | Col.0         | <i>axy2.2</i> | <i>OsMUR2-OX-axy2.2</i> |               |               |               |
|--------------|---------------|---------------|-------------------------|---------------|---------------|---------------|
|              |               |               | 1                       | 2             | 3             | 4             |
| XXXG         | 34.14 ± 2.28* | 29.57 ± 0.71  | 41.05 ± 3.18*           | 44.12 ± 8.01* | 40.40 ± 2.49* | 39.21 ± 1.40* |
| XXLG/XLXG    | 9.67 ± 0.60*  | 41.84 ± 1.48  | 7.76 ± 1.33*            | 8.05 ± 0.73*  | 7.64 ± 0.54*  | 7.92 ± 1.09*  |
| XXLG/XLXG-Ac | 1.93 ± 0.28*  | 0.15 ± 0.10   | 1.85 ± 0.34*            | 2.12 ± 0.44*  | 1.78 ± 0.38*  | 2.08 ± 0.13*  |
| XXFG         | 7.68 ± 0.68*  | 0.08 ± 0.06   | 9.48 ± 0.98*            | 9.30 ± 0.74*  | 9.99 ± 0.17*  | 11.14 ± 0.81* |
| XXFG-Ac      | 12.84 ± 1.62* | 0.38 ± 0.07   | 11.66 ± 0.82*           | 10.61 ± 2.32* | 12.94 ± 1.51* | 13.67 ± 1.50* |
| XLLG         | 2.76 ± 0.70*  | 27.11 ± 0.48  | 1.79 ± 0.95*            | 1.82 ± 0.54*  | 1.45 ± 0.37*  | 2.45 ± 0.55*  |
| XLLG-Ac      | 2.35 ± 0.18*  | 0.44 ± 0.10   | 2.07 ± 0.21*            | 2.28 ± 0.49*  | 2.01 ± 0.09*  | 1.72 ± 0.08*  |
| XLFG         | 9.55 ± 1.84*  | 0.11 ± 0.09   | 11.10 ± 1.47*           | 9.94 ± 1.39*  | 10.47 ± 1.03* | 10.54 ± 0.73* |
| XLFG-Ac      | 19.08 ± 2.16* | 0.32 ± 0.13   | 13.24 ± 1.64*           | 11.77 ± 3.92* | 13.33 ± 1.72* | 11.26 ± 2.07* |

Asterisk indicates statistically significant difference from the mutant (*axy2.2*;  $P < 0.05$ ),  $n \geq 3$ .

**Supplementary Table S4.** Relative quantification of XyG oligosaccharides profiles of *Col.0*, *axy4-3*, and *OsAXY4* transformed into the Arabidopsis *axy4-3* mutant.

|              | Col.0         | <i>axy4-3</i> | <i>OsAXY4-OX-axy4-3</i> |              |               |               |               |
|--------------|---------------|---------------|-------------------------|--------------|---------------|---------------|---------------|
|              |               |               | 1                       | 2            | 3             | 4             | 5             |
| XXXG         | 29.11 ± 1.60  | 26.48 ± 1.58  | 24.36 ± 0.69*           | 29.16 ± 2.76 | 27.13 ± 1.82  | 29.03 ± 2.96  | 29.19 ± 1.91  |
| XXLG/XLXG    | 9.07 ± 0.28*  | 10.96 ± 0.63  | 9.76 ± 0.49*            | 11.58 ± 1.28 | 10.34 ± 0.11  | 11.24 ± 1.32  | 11.17 ± 0.66  |
| XXLG/XLXG-Ac | 2.20 ± 0.28*  | 0.08 ± 0.01   | 0.15 ± 0.15             | 0.32 ± 0.18* | 0.87 ± 0.34*  | 0.46 ± 0.18*  | 0.32 ± 0.03*  |
| XXFG         | 7.47 ± 1.00*  | 25.79 ± 1.14  | 26.71 ± 2.93            | 25.73 ± 1.07 | 23.44 ± 1.12* | 23.18 ± 1.19* | 26.61 ± 1.89  |
| XXFG-Ac      | 16.19 ± 1.18* | -0.30 ± 0.08  | 0.61 ± 0.07*            | 0.35 ± 0.70  | 2.01 ± 0.35*  | 0.80 ± 0.22*  | 0.44 ± 0.46*  |
| XLLG         | 2.68 ± 0.47*  | 4.24 ± 0.18   | 3.89 ± 0.36             | 4.21 ± 0.37  | 4.05 ± 0.25   | 4.44 ± 0.37   | 3.76 ± 0.45   |
| XLLG-Ac      | 2.75 ± 0.06*  | 0.12 ± 0.03   | 0.19 ± 0.15             | 0.22 ± 0.15  | 0.61 ± 0.23*  | 0.37 ± 0.07*  | 0.35 ± 0.09*  |
| XLFG         | 7.30 ± 1.09*  | 32.76 ± 1.82  | 33.77 ± 3.79            | 27.75 ± 4.19 | 27.94 ± 3.09* | 29.31 ± 4.29  | 27.42 ± 3.43* |
| XLFG-Ac      | 23.22 ± 1.30* | -0.13 ± 0.23  | 0.55 ± 0.26*            | 0.68 ± 0.12* | 3.60 ± 0.60*  | 1.16 ± 0.23*  | 0.73 ± 0.33*  |

Asterisk indicates statistically significant difference from the mutant (*axy4-3*;  $P < 0.05$ ),  $n = 4$ .

**Supplementary Table S5.** Relative quantification of XyG oligosaccharides profiles of *Col.0*, *xlt2 mur3.1*, *OsMUR3*, and *OsXLT2* transformed into the Arabidopsis *xlt2 mur3.1* mutant.

|             | Col.0       | <i>xlt2 mur3.1</i> | <i>OsMUR3-OX-xlt2 mur3.1</i> |              |              |             | <i>OsXLT2-OX-xlt2 mur3.1</i> |             |             |             |           |
|-------------|-------------|--------------------|------------------------------|--------------|--------------|-------------|------------------------------|-------------|-------------|-------------|-----------|
|             |             |                    | 1                            | 2            | 3            | 4           | 1                            | 2           | 3           | 4           | 5         |
| XXG         | 34.51±2.20* | 89.78±4.62         | 20.62±14.09*                 | 1.76±0.64*   | 1.96±0.94*   | 1.43±0.35*  | 65.28±1.97*                  | 70.42±2.08* | 64.83±5.30* | 69.79±0.45* | 82.99±3.2 |
| XLG/XLXG    | 7.66±0.61*  | 1.04±0.69          | 6.32±1.53*                   | 6.72±3.33*   | 6.43±1.76*   | 6.78±1.76*  | 28.54±2.50*                  | 23.12±1.19* | 26.79±3.58* | 21.94±0.63* | 10.05±2.9 |
| XLG/XLXG-Ac | 1.42±0.18*  | -0.05±0.16         | 4.20±0.91*                   | 4.92±0.61*   | 5.00±1.69*   | 4.98±0.43*  | 0.04±0.11                    | -0.02±0.09  | 0.23±0.43   | -0.08±0.05  | -0.06±0.2 |
| XFG         | 4.14±1.55*  | 0.80±0.90          | 21.35±11.81*                 | 26.43±9.20*  | 36.23±14.64* | 37.54±6.59* | 0.45±0.23                    | 0.46±0.06   | 0.68±0.31   | 0.73±0.15   | 0.62±0.2  |
| XFG-Ac      | 17.39±1.55* | 5.85±0.50          | 44.39±5.97*                  | 54.15±11.86* | 45.21±13.54* | 45.25±7.14* | 3.21±0.61*                   | 3.91±0.57*  | 4.21±1.32   | 4.44±0.78*  | 6.22±1.0  |
| LLG         | 1.16±0.48   | 0.11±0.92          | 0.84±0.79                    | 1.61±0.74*   | 1.59±0.85*   | 1.45±0.50*  | 0.07±0.15                    | 0.12±0.12   | 0.15±0.20   | 0.20±0.10   | -0.30±0.2 |
| LLG-Ac      | 1.67±0.12*  | 0.42±0.73          | 1.07±0.34                    | 1.80±0.77*   | 1.06±0.35    | 0.83±0.57   | 0.04±0.09                    | 0.02±0.03   | 0.06±0.40   | -0.07±0.19  | -0.32±0.2 |
| LFG         | 4.88±2.60*  | 1.03±1.07          | 0.69±0.49                    | 1.28±1.04    | 1.21±0.65    | 0.77±0.64   | 0.24±0.10                    | 0.06±0.10   | 0.15±0.25   | 0.13±0.08   | -0.17±0.0 |
| LFG-Ac      | 27.18±2.86* | 1.02±0.75          | 0.51±0.26                    | 1.32±0.46    | 1.29±0.68    | 0.97±0.65   | 2.14±0.16*                   | 1.91±0.51   | 2.90±1.31*  | 2.92±0.46*  | 0.97±0.2  |

Asterisk indicates statistically significant difference from the mutant (*xlt2mur3*;  $P < 0.05$ ),  $n = 4$ .

### Supplementary Table S6. Primers used in this study.

| Primer               | Sequence (5'→3')                                        |
|----------------------|---------------------------------------------------------|
| Os04g48480-CDS-GW-F  | GGGGACAAGTTTGTACAAAAAAGCAGGCTATGGCCGCGATGTATCGTCCC      |
| Os04g48480-CDS-GW-R  | GGGGACCACTTTGTACAAGAAAGCTGGGTTTACACTTTCCTCCAACCTCCGTCGT |
| Os03g051110-CDS-GW-F | GGGGACAAGTTTGTACAAAAAAGCAGGCTATGTCTGCTATGAGACGACGACC    |
| Os03g051110-CDS-GW-R | GGGGACCACTTTGTACAAGAAAGCTGGGTTTAGTTCTGACCTCTTTGTTTCGTTT |
| Os02g52630-CDS-GW-F  | GGGGACAAGTTTGTACAAAAAAGCAGGCTATGCAGGTGCAGCAACGCAAG      |
| Os02g52630-CDS-GW-R  | GGGGACCACTTTGTACAAGAAAGCTGGGTCTAGTTCGGACTTCCATTCCGGATC  |
| Os06g12870-CDS-GW-F  | GGGGACAAGTTTGTACAAAAAAGCAGGCTATGGTGACCACAAATTTTCGTGCAGA |
| Os06g12870-CDS-GW-R  | GGGGACCACTTTGTACAAGAAAGCTGGGTTTCATCTGGTGATGGTCTGGAGCAGA |
|                      |                                                         |
| axy2.2-del-F         | CACTAGATACTACGAAGCTTACTTATC                             |
| axy2.2-del-R         | TTCGCTTTACAATCATAGAATGGAG                               |
| mur3.1-geno-F        | CGAAGATCGGCATTTGACTC                                    |
| mur3.1-geno-R        | CATCCTCGGGGATGAATATC                                    |
| Gabi-LB              | CCCATTGGACGTGAATGTAG                                    |
| AtXLT2 -LP           | GGAAACCGCTCTTCCTACATC                                   |
| AtXLT2-RP            | TCCGGTTTATCCGGTAAAAAC                                   |
| Salk_044972-LP       | TTATGCGATTATACGCAAGGG                                   |
| Salk_044972-RP       | TCATTTAAACCTTCCATCGCC                                   |

|                      |                             |
|----------------------|-----------------------------|
| SALK_LBa1            | TGGTTCACGTAGTGGGCCATCG      |
|                      |                             |
| pOREE4GW-Seq-F       | GGGAGAATTCGTCTCGACTTTG      |
| Os4g48480-Genotype-R | CCATTAGACCGCTTGTAGTACG      |
| Os3g05110-Genotype-R | CACATATTGGTCCAGAGGCTGAG     |
| Os2g52630-Genotype-R | GTCTCTGGAGCTCCTCGTGCATC     |
| PGWB511GW-seq-F      | TGATATCTCCACTGACGTAAG       |
| Os6g12870-Genotype-R | CGCAGCTCGTCCCGTTGTAGAG      |
|                      |                             |
| AtPTB-RT-F           | GCGAATGTCTTATTCAGCTCATACTGA |
| AtPTB-RT-R           | CATTGCTGCTGTTGGTATATCAGAGTA |
| OsMUR3-qRT-F         | ACAGTTGAGAAGAGATA           |
| OsMUR3-qRT-R         | ATTAGTAGATGGATTAGTAG        |
| OsXLT2-RT-4F         | GTGTACGTCTACGACCTCCC        |
| OsXLT2-RT-4R         | GAGTACCACGACCCAACCAG        |
| OsMUR2-RT-2F         | ACGAGAAATCATGTCGCAGC        |
| OsMUR2-RT-2R         | GACCACGTA CTGCACTGCT        |
| OsAXY4-RT-3F         | CCTCTACGCTCTCATCCCTCT       |
| OsAXY4-RT-3R         | TTCTCCGGCTATCGCATTCTTCTT    |

Reference:

Corpet F (1988) Multiple sequence alignment with hierarchical clustering. *Nucleic Acids Res* 16: 10881-10890
